# Supplementary material
Source: publisher figshare collection journal article supplement (https://acs.figshare.com/ndownloader/files/5795028)
Supplement: Supplementary file 1 [file 5795028]

data_Complex_1 
 
_audit_creation_method            SHELXL-97 
_chemical_name_systematic 
; 
 ? 
; 
_chemical_name_common             ? 
_chemical_melting_point           ? 
_chemical_formula_moiety          ? 
_chemical_formula_sum 
 'C20 H24 Cl2 Fe N2' 
_chemical_formula_weight          419.16 
 
loop_ 
 _atom_type_symbol 
 _atom_type_description 
 _atom_type_scat_dispersion_real 
 _atom_type_scat_dispersion_imag 
 _atom_type_scat_source 
 'C'  'C'   0.0033   0.0016 
 'International Tables Vol C Tables 4.2.6.8 and 6.1.1.4' 
 'H'  'H'   0.0000   0.0000 
 'International Tables Vol C Tables 4.2.6.8 and 6.1.1.4' 
 'Cl'  'Cl'   0.1484   0.1585 
 'International Tables Vol C Tables 4.2.6.8 and 6.1.1.4' 
 'Fe'  'Fe'   0.3463   0.8444 
 'International Tables Vol C Tables 4.2.6.8 and 6.1.1.4' 
 'N'  'N'   0.0061   0.0033 
 'International Tables Vol C Tables 4.2.6.8 and 6.1.1.4' 
 
_symmetry_cell_setting            monoclinic 
_symmetry_space_group_name_H-M    C2/c 
 
loop_ 
 _symmetry_equiv_pos_as_xyz 
 'x, y, z' 
 '-x, y, -z+1/2' 
 'x+1/2, y+1/2, z' 
 '-x+1/2, y+1/2, -z+1/2' 
 '-x, -y, -z' 
 'x, -y, z-1/2' 
 '-x+1/2, -y+1/2, -z' 
 'x+1/2, -y+1/2, z-1/2' 
 
_cell_length_a                    28.675(2) 
_cell_length_b                    14.4213(11) 
_cell_length_c                    14.2903(11) 
_cell_angle_alpha                 90.00 
_cell_angle_beta                  109.6480(10) 
_cell_angle_gamma                 90.00 
_cell_volume                      5565.4(8) 
_cell_formula_units_Z             8 
_cell_measurement_temperature     100(1) 
_cell_measurement_reflns_used     9172  
_cell_measurement_theta_min       2.66 
_cell_measurement_theta_max       25.095 
 
_exptl_crystal_description        plate 
_exptl_crystal_colour             purple
_exptl_crystal_size_max           1.00 
_exptl_crystal_size_mid           0.31 
_exptl_crystal_size_min           0.23 
_exptl_crystal_density_meas       ? 
_exptl_crystal_density_diffrn     1.001 
_exptl_crystal_density_method     'not measured' 
_exptl_crystal_F_000              1744 
_exptl_absorpt_coefficient_mu     0.737 
_exptl_absorpt_correction_type    numerical 
_exptl_absorpt_correction_T_min   0.5259 
_exptl_absorpt_correction_T_max   0.8464 
_exptl_absorpt_process_details    'SADABS (Sheldrick, 2009)'  
 
_exptl_special_details 
; 
 ? 
; 
 
_diffrn_ambient_temperature       100(1) 
_diffrn_radiation_wavelength      0.71073 
_diffrn_radiation_type            MoK\a 
_diffrn_radiation_source          'fine-focus sealed tube' 
_diffrn_radiation_monochromator   graphite 
_diffrn_measurement_device_type   'CCD area detector'
_diffrn_measurement_method        'phi and omega scans'   
_diffrn_detector_area_resol_mean  ? 
_diffrn_reflns_number             5301 
_diffrn_reflns_av_R_equivalents   0.0000 
_diffrn_reflns_av_sigmaI/netI     0.0311 
_diffrn_reflns_limit_h_min        -34 
_diffrn_reflns_limit_h_max        32 
_diffrn_reflns_limit_k_min        0 
_diffrn_reflns_limit_k_max        17 
_diffrn_reflns_limit_l_min        0 
_diffrn_reflns_limit_l_max        17 
_diffrn_reflns_theta_min          1.51 
_diffrn_reflns_theta_max          25.73 
_reflns_number_total              5301 
_reflns_number_gt                 3937 
_reflns_threshold_expression      >2sigma(I) 
 
_computing_data_collection        'APEX2 v2009.3.0 (Bruker-AXS, 2009)' 
_computing_cell_refinement        'SAINT 7.46A (Bruker-AXS, 2009)' 
_computing_data_reduction         'SAINT 7.46A (Bruker-AXS, 2009)' 
_computing_structure_solution     'SHELXS-97 (Sheldrick, 2008)' 
_computing_structure_refinement   'SHELXL-97 (Sheldrick, 2008)' 
_computing_molecular_graphics     'Bruker SHELXTL' 
_computing_publication_material   'Bruker SHELXTL'
 
_refine_special_details 
; 
 Refinement of F^2^ against ALL reflections.  The weighted R-factor wR and 
 goodness of fit S are based on F^2^, conventional R-factors R are based 
 on F, with F set to zero for negative F^2^. The threshold expression of 
 F^2^ > 2sigma(F^2^) is used only for calculating R-factors(gt) etc. and is 
 not relevant to the choice of reflections for refinement.  R-factors based 
 on F^2^ are statistically about twice as large as those based on F, and R- 
 factors based on ALL data will be even larger. 
; 

# start Validation Reply Form
_vrf_PLAT602_Complex_1
;
PROBLEM: VERY LARGE Solvent Accessible VOID(S) in Structure
RESPONSE: a solvent mask was implemented in the Olex 2 software due to the
highly disordered hydrocarbon solvent molecules.
;
# end Validation Reply Form
 
_refine_ls_structure_factor_coef  Fsqd  
_refine_ls_matrix_type            full 
_refine_ls_weighting_scheme       calc  
_refine_ls_weighting_details 
 'calc w=1/[\s^2^(Fo^2^)+(0.0916P)^2^+8.3740P] where P=(Fo^2^+2Fc^2^)/3' 
_atom_sites_solution_primary      direct 
_atom_sites_solution_secondary    difmap 
_atom_sites_solution_hydrogens    geom 
_refine_ls_hydrogen_treatment     constr 
_refine_ls_extinction_method      none 
_refine_ls_extinction_coef        ? 
_refine_ls_number_reflns          5301 
_refine_ls_number_parameters      232 
_refine_ls_number_restraints      0 
_refine_ls_R_factor_all           0.0619 
_refine_ls_R_factor_gt            0.0466 
_refine_ls_wR_factor_ref          0.1737 
_refine_ls_wR_factor_gt           0.1676 
_refine_ls_goodness_of_fit_ref    1.150 
_refine_ls_restrained_S_all       1.150 
_refine_ls_shift/su_max           0.001 
_refine_ls_shift/su_mean          0.000 
 
loop_ 
 _atom_site_label 
 _atom_site_type_symbol 
 _atom_site_fract_x 
 _atom_site_fract_y 
 _atom_site_fract_z 
 _atom_site_U_iso_or_equiv 
 _atom_site_adp_type 
 _atom_site_occupancy 
 _atom_site_symmetry_multiplicity 
 _atom_site_calc_flag 
 _atom_site_refinement_flags 
 _atom_site_disorder_assembly 
 _atom_site_disorder_group 
Fe47 Fe 0.79003(2) 0.40700(3) 0.79071(4) 0.03314(19) Uani 1 1 d . . . 
Cl46 Cl 0.78285(4) 0.38518(6) 0.94007(7) 0.0463(3) Uani 1 1 d . . . 
Cl45 Cl 0.81823(4) 0.28804(6) 0.72465(7) 0.0485(3) Uani 1 1 d . . . 
N44 N 0.81957(10) 0.53874(18) 0.78049(19) 0.0282(6) Uani 1 1 d . . . 
N43 N 0.73045(11) 0.47810(19) 0.6859(2) 0.0357(7) Uani 1 1 d . . . 
C1DA C 0.79071(13) 0.5977(2) 0.7224(2) 0.0290(7) Uani 1 1 d . . . 
C2DA C 0.73949(13) 0.5618(2) 0.6650(3) 0.0331(8) Uani 1 1 d . . . 
C49 C 0.87679(15) 0.6043(2) 0.9338(3) 0.0404(9) Uani 1 1 d . . . 
C48 C 0.68255(14) 0.4389(2) 0.6359(3) 0.0411(9) Uani 1 1 d . . . 
C51 C 0.86946(13) 0.5648(2) 0.8408(2) 0.0327(8) Uani 1 1 d . . . 
C5CA C 0.67480(16) 0.3921(2) 0.5453(3) 0.0458(10) Uani 1 1 d . . . 
C31 C 0.70388(14) 0.6234(2) 0.5925(3) 0.0399(9) Uani 1 1 d . . . 
H31A H 0.6943 0.6741 0.6280 0.060 Uiso 1 1 calc R . . 
H31B H 0.6744 0.5878 0.5551 0.060 Uiso 1 1 calc R . . 
H31C H 0.7194 0.6491 0.5466 0.060 Uiso 1 1 calc R . . 
C7CA C 0.83430(18) 0.6267(3) 0.9678(3) 0.0529(11) Uani 1 1 d . . . 
H7CA H 0.8155 0.5701 0.9682 0.079 Uiso 1 1 calc R . . 
H7CB H 0.8127 0.6721 0.9225 0.079 Uiso 1 1 calc R . . 
H7CC H 0.8468 0.6527 1.0350 0.079 Uiso 1 1 calc R . . 
C35 C 0.90772(14) 0.5447(3) 0.8048(3) 0.0447(9) Uani 1 1 d . . . 
C25 C 0.80338(14) 0.6953(2) 0.7084(3) 0.0431(9) Uani 1 1 d . . . 
H25A H 0.8020 0.7044 0.6395 0.065 Uiso 1 1 calc R . . 
H25B H 0.8369 0.7091 0.7535 0.065 Uiso 1 1 calc R . . 
H25C H 0.7796 0.7369 0.7228 0.065 Uiso 1 1 calc R . . 
C3CA C 0.92514(19) 0.6229(3) 0.9925(3) 0.0588(13) Uani 1 1 d . . . 
H3CA H 0.9314 0.6488 1.0567 0.071 Uiso 1 1 calc R . . 
C4CA C 0.71564(18) 0.3832(3) 0.5025(3) 0.0534(11) Uani 1 1 d . . . 
H4CA H 0.7457 0.3607 0.5539 0.080 Uiso 1 1 calc R . . 
H4CB H 0.7222 0.4439 0.4787 0.080 Uiso 1 1 calc R . . 
H4CC H 0.7058 0.3393 0.4470 0.080 Uiso 1 1 calc R . . 
C38 C 0.89679(17) 0.5023(3) 0.7025(3) 0.0567(12) Uani 1 1 d . . . 
H38A H 0.8717 0.5396 0.6533 0.085 Uiso 1 1 calc R . . 
H38B H 0.8844 0.4390 0.7025 0.085 Uiso 1 1 calc R . . 
H38C H 0.9272 0.5010 0.6855 0.085 Uiso 1 1 calc R . . 
C8CA C 0.5917(2) 0.3613(4) 0.5380(5) 0.0787(17) Uani 1 1 d . . . 
H8CA H 0.5601 0.3354 0.5037 0.094 Uiso 1 1 calc R . . 
C24 C 0.64579(16) 0.4473(3) 0.6798(4) 0.0581(11) Uani 1 1 d . . . 
C1CA C 0.9641(2) 0.6050(4) 0.9608(4) 0.0790(18) Uani 1 1 d . . . 
H1CA H 0.9968 0.6192 1.0025 0.095 Uiso 1 1 calc R . . 
C6CA C 0.95603(18) 0.5656(4) 0.8667(4) 0.0740(16) Uani 1 1 d . . . 
H6CA H 0.9833 0.5530 0.8451 0.089 Uiso 1 1 calc R . . 
C0DA C 0.60008(18) 0.4074(4) 0.6306(5) 0.0732(15) Uani 1 1 d . . . 
H0DA H 0.5744 0.4106 0.6586 0.088 Uiso 1 1 calc R . . 
C40 C 0.65633(19) 0.4988(5) 0.7758(4) 0.0863(19) Uani 1 1 d . . . 
H40A H 0.6610 0.5647 0.7651 0.129 Uiso 1 1 calc R . . 
H40B H 0.6864 0.4739 0.8250 0.129 Uiso 1 1 calc R . . 
H40C H 0.6284 0.4913 0.8002 0.129 Uiso 1 1 calc R . . 
C0AA C 0.6289(2) 0.3543(3) 0.4981(4) 0.0626(13) Uani 1 1 d . . . 
H0AA H 0.6228 0.3228 0.4368 0.075 Uiso 1 1 calc R . . 
 
loop_ 
 _atom_site_aniso_label 
 _atom_site_aniso_U_11 
 _atom_site_aniso_U_22 
 _atom_site_aniso_U_33 
 _atom_site_aniso_U_23 
 _atom_site_aniso_U_13 
 _atom_site_aniso_U_12 
Fe47 0.0508(4) 0.0205(3) 0.0334(3) -0.00098(19) 0.0211(2) -0.0012(2) 
Cl46 0.0785(7) 0.0297(5) 0.0432(5) -0.0040(4) 0.0370(5) -0.0089(4) 
Cl45 0.0851(8) 0.0302(5) 0.0406(5) 0.0017(4) 0.0349(5) 0.0112(5) 
N44 0.0382(16) 0.0226(14) 0.0278(14) -0.0023(11) 0.0163(12) 0.0009(12) 
N43 0.0429(18) 0.0249(15) 0.0418(17) -0.0099(12) 0.0177(14) -0.0046(13) 
C1DA 0.0362(19) 0.0210(16) 0.0345(17) -0.0021(13) 0.0179(15) 0.0061(14) 
C2DA 0.041(2) 0.0236(17) 0.0379(18) -0.0081(14) 0.0180(16) 0.0019(15) 
C49 0.062(3) 0.0229(18) 0.0329(19) 0.0020(14) 0.0110(18) -0.0046(16) 
C48 0.048(2) 0.0250(18) 0.048(2) -0.0029(16) 0.0129(18) -0.0049(16) 
C51 0.044(2) 0.0213(16) 0.0316(17) 0.0008(13) 0.0115(15) 0.0011(14) 
C5CA 0.064(3) 0.0177(17) 0.048(2) -0.0025(15) 0.009(2) -0.0017(17) 
C31 0.037(2) 0.0267(18) 0.053(2) -0.0059(16) 0.0118(17) 0.0029(15) 
C7CA 0.092(3) 0.036(2) 0.043(2) -0.0128(17) 0.039(2) -0.019(2) 
C35 0.038(2) 0.037(2) 0.057(2) -0.0063(18) 0.0138(18) 0.0055(17) 
C25 0.043(2) 0.0216(18) 0.059(2) 0.0037(16) 0.0094(18) 0.0006(15) 
C3CA 0.078(3) 0.038(2) 0.042(2) -0.0020(18) -0.003(2) 0.007(2) 
C4CA 0.091(3) 0.031(2) 0.038(2) -0.0037(16) 0.022(2) 0.001(2) 
C38 0.057(3) 0.059(3) 0.069(3) -0.024(2) 0.040(2) -0.007(2) 
C8CA 0.060(3) 0.047(3) 0.098(4) -0.003(3) -0.015(3) -0.017(2) 
C24 0.045(3) 0.061(3) 0.069(3) -0.011(2) 0.020(2) -0.008(2) 
C1CA 0.053(3) 0.060(3) 0.088(4) -0.019(3) -0.023(3) 0.013(2) 
C6CA 0.043(3) 0.072(3) 0.096(4) -0.027(3) 0.009(3) 0.010(2) 
C0DA 0.044(3) 0.069(3) 0.104(4) 0.000(3) 0.021(3) -0.011(2) 
C40 0.049(3) 0.143(6) 0.076(4) -0.030(4) 0.033(3) 0.001(3) 
C0AA 0.073(3) 0.028(2) 0.067(3) -0.007(2) -0.003(3) -0.002(2) 
 
_geom_special_details 
; 
 All esds (except the esd in the dihedral angle between two l.s. planes) 
 are estimated using the full covariance matrix.  The cell esds are taken 
 into account individually in the estimation of esds in distances, angles 
 and torsion angles; correlations between esds in cell parameters are only 
 used when they are defined by crystal symmetry.  An approximate (isotropic) 
 treatment of cell esds is used for estimating esds involving l.s. planes. 
; 
 
loop_ 
 _geom_bond_atom_site_label_1 
 _geom_bond_atom_site_label_2 
 _geom_bond_distance 
 _geom_bond_site_symmetry_2 
 _geom_bond_publ_flag 
Fe47 N44 2.105(3) . ? 
Fe47 N43 2.120(3) . ? 
Fe47 Cl46 2.2345(10) . ? 
Fe47 Cl45 2.2366(10) . ? 
N44 C1DA 1.279(4) . ? 
N44 C51 1.450(4) . ? 
N43 C2DA 1.291(5) . ? 
N43 C48 1.434(5) . ? 
C1DA C25 1.484(5) . ? 
C1DA C2DA 1.513(5) . ? 
C2DA C31 1.481(5) . ? 
C49 C3CA 1.384(6) . ? 
C49 C51 1.395(5) . ? 
C49 C7CA 1.491(6) . ? 
C48 C24 1.402(6) . ? 
C48 C5CA 1.410(5) . ? 
C51 C35 1.390(5) . ? 
C5CA C0AA 1.374(6) . ? 
C5CA C4CA 1.497(6) . ? 
C35 C6CA 1.403(6) . ? 
C35 C38 1.517(6) . ? 
C3CA C1CA 1.363(8) . ? 
C8CA C0AA 1.373(8) . ? 
C8CA C0DA 1.427(8) . ? 
C24 C0DA 1.387(6) . ? 
C24 C40 1.498(7) . ? 
C1CA C6CA 1.405(8) . ? 
 
loop_ 
 _geom_angle_atom_site_label_1 
 _geom_angle_atom_site_label_2 
 _geom_angle_atom_site_label_3 
 _geom_angle 
 _geom_angle_site_symmetry_1 
 _geom_angle_site_symmetry_3 
 _geom_angle_publ_flag 
N44 Fe47 N43 76.23(11) . . ? 
N44 Fe47 Cl46 111.21(7) . . ? 
N43 Fe47 Cl46 115.59(8) . . ? 
N44 Fe47 Cl45 116.87(8) . . ? 
N43 Fe47 Cl45 113.12(8) . . ? 
Cl46 Fe47 Cl45 117.24(4) . . ? 
C1DA N44 C51 120.5(3) . . ? 
C1DA N44 Fe47 117.2(2) . . ? 
C51 N44 Fe47 122.2(2) . . ? 
C2DA N43 C48 119.1(3) . . ? 
C2DA N43 Fe47 116.0(2) . . ? 
C48 N43 Fe47 124.8(2) . . ? 
N44 C1DA C25 125.7(3) . . ? 
N44 C1DA C2DA 115.0(3) . . ? 
C25 C1DA C2DA 119.2(3) . . ? 
N43 C2DA C31 125.3(3) . . ? 
N43 C2DA C1DA 115.4(3) . . ? 
C31 C2DA C1DA 119.3(3) . . ? 
C3CA C49 C51 117.1(4) . . ? 
C3CA C49 C7CA 121.5(4) . . ? 
C51 C49 C7CA 121.4(4) . . ? 
C24 C48 C5CA 122.9(4) . . ? 
C24 C48 N43 118.8(3) . . ? 
C5CA C48 N43 118.3(4) . . ? 
C35 C51 C49 123.6(4) . . ? 
C35 C51 N44 118.0(3) . . ? 
C49 C51 N44 118.4(3) . . ? 
C0AA C5CA C48 118.0(4) . . ? 
C0AA C5CA C4CA 121.2(4) . . ? 
C48 C5CA C4CA 120.8(4) . . ? 
C51 C35 C6CA 117.1(4) . . ? 
C51 C35 C38 120.5(3) . . ? 
C6CA C35 C38 122.3(4) . . ? 
C1CA C3CA C49 121.8(4) . . ? 
C0AA C8CA C0DA 120.4(4) . . ? 
C0DA C24 C48 117.5(4) . . ? 
C0DA C24 C40 122.4(5) . . ? 
C48 C24 C40 120.2(4) . . ? 
C3CA C1CA C6CA 120.4(4) . . ? 
C35 C6CA C1CA 120.0(5) . . ? 
C24 C0DA C8CA 120.0(5) . . ? 
C8CA C0AA C5CA 121.2(5) . . ? 
 
_diffrn_measured_fraction_theta_max    0.998 
_diffrn_reflns_theta_full              25.73 
_diffrn_measured_fraction_theta_full   0.998 
_refine_diff_density_max    0.379 
_refine_diff_density_min   -0.352 
_refine_diff_density_rms    0.085 
 
data_complex_2
 
_audit_creation_method            SHELXL-97 
_chemical_name_systematic 
; 
 ? 
; 
_chemical_name_common             ? 
_chemical_melting_point           ? 
_chemical_formula_moiety          ? 
_chemical_formula_sum 
 'C28 H36 Fe N2' 
_chemical_formula_weight          456.44 
 
loop_ 
 _atom_type_symbol 
 _atom_type_description 
 _atom_type_scat_dispersion_real 
 _atom_type_scat_dispersion_imag 
 _atom_type_scat_source 
 'C'  'C'   0.0033   0.0016 
 'International Tables Vol C Tables 4.2.6.8 and 6.1.1.4' 
 'H'  'H'   0.0000   0.0000 
 'International Tables Vol C Tables 4.2.6.8 and 6.1.1.4' 
 'Fe'  'Fe'   0.3463   0.8444 
 'International Tables Vol C Tables 4.2.6.8 and 6.1.1.4' 
 'N'  'N'   0.0061   0.0033 
 'International Tables Vol C Tables 4.2.6.8 and 6.1.1.4' 
 
_symmetry_cell_setting            monoclinic 
_symmetry_space_group_name_H-M    P21/c 
 
loop_ 
 _symmetry_equiv_pos_as_xyz 
 'x, y, z' 
 '-x, y+1/2, -z+1/2' 
 '-x, -y, -z' 
 'x, -y-1/2, z-1/2' 
 
_cell_length_a                    9.8016(10) 
_cell_length_b                    30.318(3) 
_cell_length_c                    8.3018(8) 
_cell_angle_alpha                 90.00 
_cell_angle_beta                  104.986(2) 
_cell_angle_gamma                 90.00 
_cell_volume                      2383.1(4) 
_cell_formula_units_Z             4 
_cell_measurement_temperature     100(2) 
_cell_measurement_reflns_used     9859 
_cell_measurement_theta_min       2.25 
_cell_measurement_theta_max       25.7 
 
_exptl_crystal_description        plate 
_exptl_crystal_colour             brown 
_exptl_crystal_size_max           0.44 
_exptl_crystal_size_mid           0.28 
_exptl_crystal_size_min           0.15 
_exptl_crystal_density_meas       ? 
_exptl_crystal_density_diffrn     1.272 
_exptl_crystal_density_method     'not measured' 
_exptl_crystal_F_000              976 
_exptl_absorpt_coefficient_mu     0.650 
_exptl_absorpt_correction_type    multi-scan 
_exptl_absorpt_correction_T_min   0.7629 
_exptl_absorpt_correction_T_max   0.9110 
_exptl_absorpt_process_details    'SADABS (Sheldrick, 2008)' 
 
_exptl_special_details 
; 
 ? 
; 
 
_diffrn_ambient_temperature       100(2) 
_diffrn_radiation_wavelength      0.71073 
_diffrn_radiation_type            MoK\a 
_diffrn_radiation_source          'fine-focus sealed tube' 
_diffrn_radiation_monochromator   graphite 
_diffrn_measurement_device_type   
;
Bruker D8 goniometer with CCD area detector
; 
_diffrn_measurement_method        'phi and omega scans' 
_diffrn_detector_area_resol_mean  ? 
_diffrn_reflns_number             33227 
_diffrn_reflns_av_R_equivalents   0.0337 
_diffrn_reflns_av_sigmaI/netI     0.0219 
_diffrn_reflns_limit_h_min        -11 
_diffrn_reflns_limit_h_max        11 
_diffrn_reflns_limit_k_min        -37 
_diffrn_reflns_limit_k_max        36 
_diffrn_reflns_limit_l_min        -10 
_diffrn_reflns_limit_l_max        10 
_diffrn_reflns_theta_min          1.34 
_diffrn_reflns_theta_max          25.71 
_reflns_number_total              4531 
_reflns_number_gt                 3965 
_reflns_threshold_expression      >2sigma(I) 
 
_computing_data_collection        'APEX2 v2009.3.0 (Bruker-AXS, 2009)' 
_computing_cell_refinement        'SAINT 7.46A (Bruker-AXS, 2009)' 
_computing_data_reduction         'SAINT 7.46A (Bruker-AXS, 2009)' 
_computing_structure_solution     'SHELXS-97 (Sheldrick, 2008)' 
_computing_structure_refinement   'SHELXL-97 (Sheldrick, 2008)' 
_computing_molecular_graphics     'Bruker SHELXTL (Sheldrick, 2008)'
_computing_publication_material   'Bruker SHELXTL (Sheldrick, 2008)' 
 
_refine_special_details 
; 
 Refinement of F^2^ against ALL reflections.  The weighted R-factor wR and 
 goodness of fit S are based on F^2^, conventional R-factors R are based 
 on F, with F set to zero for negative F^2^. The threshold expression of 
 F^2^ > 2sigma(F^2^) is used only for calculating R-factors(gt) etc. and is 
 not relevant to the choice of reflections for refinement.  R-factors based 
 on F^2^ are statistically about twice as large as those based on F, and R- 
 factors based on ALL data will be even larger. 
; 
 
_refine_ls_structure_factor_coef  Fsqd  
_refine_ls_matrix_type            full 
_refine_ls_weighting_scheme       calc  
_refine_ls_weighting_details 
 'calc w=1/[\s^2^(Fo^2^)+(0.0592P)^2^+1.8855P] where P=(Fo^2^+2Fc^2^)/3' 
_atom_sites_solution_primary      direct 
_atom_sites_solution_secondary    difmap 
_atom_sites_solution_hydrogens    geom 
_refine_ls_hydrogen_treatment     mixed 
_refine_ls_extinction_method      none 
_refine_ls_extinction_coef        ? 
_refine_ls_number_reflns          4531 
_refine_ls_number_parameters      286 
_refine_ls_number_restraints      0 
_refine_ls_R_factor_all           0.0428 
_refine_ls_R_factor_gt            0.0340 
_refine_ls_wR_factor_ref          0.1029 
_refine_ls_wR_factor_gt           0.0952 
_refine_ls_goodness_of_fit_ref    1.047 
_refine_ls_restrained_S_all       1.047 
_refine_ls_shift/su_max           0.001 
_refine_ls_shift/su_mean          0.000 
 
loop_ 
 _atom_site_label 
 _atom_site_type_symbol 
 _atom_site_fract_x 
 _atom_site_fract_y 
 _atom_site_fract_z 
 _atom_site_U_iso_or_equiv 
 _atom_site_adp_type 
 _atom_site_occupancy 
 _atom_site_symmetry_multiplicity 
 _atom_site_calc_flag 
 _atom_site_refinement_flags 
 _atom_site_disorder_assembly 
 _atom_site_disorder_group 
Fe01 Fe 0.35159(3) 0.604784(8) 0.61494(3) 0.01346(11) Uani 1 1 d . . . 
N002 N 0.30499(17) 0.66466(5) 0.51560(19) 0.0119(3) Uani 1 1 d . . . 
N003 N 0.52558(17) 0.63739(5) 0.72963(18) 0.0122(3) Uani 1 1 d . . . 
C004 C 0.6664(2) 0.60752(6) 0.9941(2) 0.0140(4) Uani 1 1 d . . . 
C005 C 0.6513(2) 0.61640(6) 0.8245(2) 0.0123(4) Uani 1 1 d . . . 
C006 C 0.1675(2) 0.67774(6) 0.4197(2) 0.0122(4) Uani 1 1 d . . . 
C007 C 0.7545(2) 0.60234(6) 0.7461(2) 0.0147(4) Uani 1 1 d . . . 
C008 C 0.5287(2) 0.68008(6) 0.6862(2) 0.0139(4) Uani 1 1 d . . . 
C009 C 0.1287(2) 0.66879(6) 0.2475(2) 0.0140(4) Uani 1 1 d . . . 
C00A C 0.4038(2) 0.69565(6) 0.5748(2) 0.0143(4) Uani 1 1 d . . . 
C00B C 0.1456(2) 0.58708(6) 0.6158(2) 0.0155(4) Uani 1 1 d . . . 
H00B H 0.0843 0.6124 0.6295 0.019 Uiso 1 1 calc R . . 
C00C C 0.4446(2) 0.54257(6) 0.6057(2) 0.0161(4) Uani 1 1 d . . . 
H00C H 0.5441 0.5437 0.5961 0.019 Uiso 1 1 calc R . . 
C00D C 0.8838(2) 0.56887(7) 1.0053(3) 0.0187(4) Uani 1 1 d . . . 
H00D H 0.9624 0.5523 1.0667 0.022 Uiso 1 1 calc R . . 
C00E C 0.2380(2) 0.57264(7) 0.7642(3) 0.0184(4) Uani 1 1 d . . . 
H00E H 0.2317 0.5895 0.8656 0.022 Uiso 1 1 calc R . . 
C00F C 0.7831(2) 0.58375(7) 1.0824(2) 0.0174(4) Uani 1 1 d . . . 
H00F H 0.7938 0.5776 1.1972 0.021 Uiso 1 1 calc R . . 
C00G C -0.0087(2) 0.67875(6) 0.1564(2) 0.0168(4) Uani 1 1 d . . . 
H00G H -0.0364 0.6728 0.0401 0.020 Uiso 1 1 calc R . . 
C00H C -0.0658(2) 0.70579(6) 0.4020(2) 0.0164(4) Uani 1 1 d . . . 
H00H H -0.1323 0.7185 0.4536 0.020 Uiso 1 1 calc R . . 
C00I C 0.3422(2) 0.55010(7) 0.4557(2) 0.0182(4) Uani 1 1 d . . . 
H00I H 0.3808 0.5556 0.3572 0.022 Uiso 1 1 calc R . . 
C00J C 0.0703(2) 0.69606(6) 0.4983(2) 0.0140(4) Uani 1 1 d . . . 
C00K C 0.8698(2) 0.57815(6) 0.8383(2) 0.0170(4) Uani 1 1 d . . . 
H00K H 0.9394 0.5680 0.7859 0.020 Uiso 1 1 calc R . . 
C00L C 0.5571(2) 0.62335(7) 1.0795(2) 0.0208(5) Uani 1 1 d . . . 
H00A H 0.5256 0.6530 1.0396 0.031 Uiso 1 1 calc R . . 
H00J H 0.5985 0.6242 1.2003 0.031 Uiso 1 1 calc R . . 
H00L H 0.4763 0.6032 1.0541 0.031 Uiso 1 1 calc R . . 
C00M C 0.1081(2) 0.70461(7) 0.6840(2) 0.0198(4) Uani 1 1 d . . . 
H00M H 0.1880 0.6859 0.7393 0.030 Uiso 1 1 calc R . . 
H00N H 0.0267 0.6978 0.7277 0.030 Uiso 1 1 calc R . . 
H00O H 0.1340 0.7357 0.7054 0.030 Uiso 1 1 calc R . . 
C00N C -0.1049(2) 0.69707(6) 0.2326(3) 0.0181(4) Uani 1 1 d . . . 
H00P H -0.1979 0.7037 0.1687 0.022 Uiso 1 1 calc R . . 
C00O C 0.2311(2) 0.64823(7) 0.1626(2) 0.0206(5) Uani 1 1 d . . . 
H00Q H 0.3250 0.6612 0.2070 0.031 Uiso 1 1 calc R . . 
H00R H 0.1995 0.6538 0.0423 0.031 Uiso 1 1 calc R . . 
H00S H 0.2356 0.6164 0.1830 0.031 Uiso 1 1 calc R . . 
C00P C 0.0862(2) 0.55932(7) 0.4620(3) 0.0229(5) Uani 1 1 d . . . 
H00T H 0.0450 0.5791 0.3671 0.027 Uiso 1 1 calc R . . 
H00U H 0.0089 0.5407 0.4815 0.027 Uiso 1 1 calc R . . 
C00Q C 0.7405(2) 0.61188(7) 0.5632(2) 0.0201(5) Uani 1 1 d . . . 
H00V H 0.6417 0.6083 0.5003 0.030 Uiso 1 1 calc R . . 
H00W H 0.7998 0.5913 0.5203 0.030 Uiso 1 1 calc R . . 
H00X H 0.7710 0.6422 0.5508 0.030 Uiso 1 1 calc R . . 
C00R C 0.6560(2) 0.70907(7) 0.7523(3) 0.0211(5) Uani 1 1 d . . . 
H00Y H 0.7235 0.6937 0.8426 0.032 Uiso 1 1 calc R . . 
H00Z H 0.6264 0.7366 0.7948 0.032 Uiso 1 1 calc R . . 
H00{ H 0.7008 0.7157 0.6623 0.032 Uiso 1 1 calc R . . 
C00S C 0.2852(3) 0.52483(8) 0.7970(3) 0.0270(5) Uani 1 1 d . . . 
H00 H 0.2103 0.5052 0.7321 0.032 Uiso 1 1 calc R . . 
H00| H 0.2978 0.5182 0.9167 0.032 Uiso 1 1 calc R . . 
C00T C 0.3834(2) 0.74341(7) 0.5227(3) 0.0222(5) Uani 1 1 d . . . 
H0AA H 0.3981 0.7469 0.4111 0.033 Uiso 1 1 calc R . . 
H1AA H 0.4516 0.7617 0.6021 0.033 Uiso 1 1 calc R . . 
H00~ H 0.2872 0.7526 0.5212 0.033 Uiso 1 1 calc R . . 
C00U C 0.4240(2) 0.51511(7) 0.7500(3) 0.0239(5) Uani 1 1 d . . . 
H2AA H 0.5041 0.5206 0.8485 0.029 Uiso 1 1 calc R . . 
H3AA H 0.4259 0.4835 0.7207 0.029 Uiso 1 1 calc R . . 
C00V C 0.1958(2) 0.52938(8) 0.4142(3) 0.0266(5) Uani 1 1 d . . . 
H4AA H 0.2003 0.5010 0.4742 0.032 Uiso 1 1 calc R . . 
H5AA H 0.1653 0.5231 0.2931 0.032 Uiso 1 1 calc R . . 
 
loop_ 
 _atom_site_aniso_label 
 _atom_site_aniso_U_11 
 _atom_site_aniso_U_22 
 _atom_site_aniso_U_33 
 _atom_site_aniso_U_23 
 _atom_site_aniso_U_13 
 _atom_site_aniso_U_12 
Fe01 0.01008(17) 0.00865(16) 0.02117(17) -0.00054(10) 0.00320(12) -0.00022(10) 
N002 0.0110(8) 0.0117(8) 0.0120(7) 0.0003(6) 0.0012(6) 0.0014(6) 
N003 0.0108(8) 0.0128(8) 0.0121(7) 0.0005(6) 0.0013(6) 0.0002(6) 
C004 0.0140(10) 0.0135(9) 0.0137(9) -0.0009(7) 0.0023(8) -0.0018(7) 
C005 0.0094(10) 0.0107(9) 0.0151(9) 0.0002(7) 0.0003(7) -0.0014(7) 
C006 0.0131(10) 0.0083(9) 0.0138(9) 0.0005(7) 0.0008(7) -0.0004(7) 
C007 0.0136(10) 0.0158(10) 0.0144(9) 0.0004(7) 0.0028(8) -0.0031(7) 
C008 0.0130(10) 0.0134(9) 0.0150(9) -0.0005(7) 0.0031(7) -0.0020(8) 
C009 0.0171(11) 0.0108(9) 0.0132(9) 0.0012(7) 0.0024(8) 0.0003(7) 
C00A 0.0152(10) 0.0133(9) 0.0142(9) 0.0011(7) 0.0032(8) -0.0014(7) 
C00B 0.0109(10) 0.0135(9) 0.0235(10) 0.0009(8) 0.0071(8) -0.0016(7) 
C00C 0.0130(10) 0.0103(9) 0.0248(10) -0.0027(7) 0.0044(8) 0.0029(7) 
C00D 0.0139(10) 0.0163(10) 0.0220(10) 0.0022(8) -0.0024(8) 0.0020(8) 
C00E 0.0166(11) 0.0215(10) 0.0194(10) 0.0016(8) 0.0090(8) 0.0008(8) 
C00F 0.0185(11) 0.0180(10) 0.0130(9) 0.0013(7) -0.0010(8) -0.0014(8) 
C00G 0.0206(11) 0.0131(9) 0.0128(9) 0.0001(7) -0.0028(8) 0.0007(8) 
C00H 0.0146(10) 0.0124(9) 0.0235(10) 0.0002(7) 0.0073(8) 0.0034(8) 
C00I 0.0207(11) 0.0165(10) 0.0182(10) -0.0030(8) 0.0064(8) 0.0058(8) 
C00J 0.0171(10) 0.0092(9) 0.0146(9) 0.0004(7) 0.0019(8) 0.0007(7) 
C00K 0.0110(10) 0.0178(10) 0.0220(10) -0.0024(8) 0.0039(8) 0.0015(8) 
C00L 0.0195(11) 0.0292(12) 0.0136(9) -0.0001(8) 0.0038(8) 0.0030(9) 
C00M 0.0226(12) 0.0214(10) 0.0157(10) -0.0024(8) 0.0055(8) 0.0063(9) 
C00N 0.0120(10) 0.0161(10) 0.0217(10) 0.0020(8) -0.0035(8) 0.0017(8) 
C00O 0.0246(12) 0.0230(11) 0.0155(9) 0.0009(8) 0.0073(8) 0.0057(9) 
C00P 0.0144(11) 0.0221(11) 0.0281(11) -0.0037(9) -0.0017(9) -0.0024(8) 
C00Q 0.0173(11) 0.0285(11) 0.0161(10) 0.0018(8) 0.0072(8) 0.0018(9) 
C00R 0.0166(11) 0.0160(10) 0.0264(11) 0.0014(8) -0.0022(9) -0.0034(8) 
C00S 0.0271(13) 0.0264(12) 0.0297(12) 0.0150(9) 0.0112(10) 0.0080(10) 
C00T 0.0185(11) 0.0148(10) 0.0293(11) 0.0066(8) -0.0010(9) -0.0015(8) 
C00U 0.0232(12) 0.0199(11) 0.0275(11) 0.0066(9) 0.0043(9) 0.0071(9) 
C00V 0.0208(12) 0.0260(11) 0.0272(11) -0.0118(9) -0.0043(9) 0.0021(9) 
 
_geom_special_details 
; 
 All esds (except the esd in the dihedral angle between two l.s. planes) 
 are estimated using the full covariance matrix.  The cell esds are taken 
 into account individually in the estimation of esds in distances, angles 
 and torsion angles; correlations between esds in cell parameters are only 
 used when they are defined by crystal symmetry.  An approximate (isotropic) 
 treatment of cell esds is used for estimating esds involving l.s. planes. 
; 
 
loop_ 
 _geom_bond_atom_site_label_1 
 _geom_bond_atom_site_label_2 
 _geom_bond_distance 
 _geom_bond_site_symmetry_2 
 _geom_bond_publ_flag 
Fe01 N003 1.9881(16) . ? 
Fe01 N002 1.9975(15) . ? 
Fe01 C00B 2.091(2) . ? 
Fe01 C00C 2.1049(19) . ? 
Fe01 C00E 2.107(2) . ? 
Fe01 C00I 2.107(2) . ? 
N002 C00A 1.348(2) . ? 
N002 C006 1.433(2) . ? 
N003 C008 1.346(2) . ? 
N003 C005 1.429(2) . ? 
C004 C00F 1.390(3) . ? 
C004 C005 1.403(3) . ? 
C004 C00L 1.507(3) . ? 
C005 C007 1.403(3) . ? 
C006 C00J 1.401(3) . ? 
C006 C009 1.408(3) . ? 
C007 C00K 1.398(3) . ? 
C007 C00Q 1.516(3) . ? 
C008 C00A 1.411(3) . ? 
C008 C00R 1.508(3) . ? 
C009 C00G 1.396(3) . ? 
C009 C00O 1.503(3) . ? 
C00A C00T 1.510(3) . ? 
C00B C00E 1.397(3) . ? 
C00B C00P 1.514(3) . ? 
C00B H00B 1.0000 . ? 
C00C C00I 1.401(3) . ? 
C00C C00U 1.515(3) . ? 
C00C H00C 1.0000 . ? 
C00D C00F 1.383(3) . ? 
C00D C00K 1.387(3) . ? 
C00D H00D 0.9500 . ? 
C00E C00S 1.525(3) . ? 
C00E H00E 1.0000 . ? 
C00F H00F 0.9500 . ? 
C00G C00N 1.381(3) . ? 
C00G H00G 0.9500 . ? 
C00H C00N 1.385(3) . ? 
C00H C00J 1.397(3) . ? 
C00H H00H 0.9500 . ? 
C00I C00V 1.522(3) . ? 
C00I H00I 1.0000 . ? 
C00J C00M 1.512(3) . ? 
C00K H00K 0.9500 . ? 
C00L H00A 0.9800 . ? 
C00L H00J 0.9800 . ? 
C00L H00L 0.9800 . ? 
C00M H00M 0.9800 . ? 
C00M H00N 0.9800 . ? 
C00M H00O 0.9800 . ? 
C00N H00P 0.9500 . ? 
C00O H00Q 0.9800 . ? 
C00O H00R 0.9800 . ? 
C00O H00S 0.9800 . ? 
C00P C00V 1.535(3) . ? 
C00P H00T 0.9900 . ? 
C00P H00U 0.9900 . ? 
C00Q H00V 0.9800 . ? 
C00Q H00W 0.9800 . ? 
C00Q H00X 0.9800 . ? 
C00R H00Y 0.9800 . ? 
C00R H00Z 0.9800 . ? 
C00R H00{ 0.9800 . ? 
C00S C00U 1.538(3) . ? 
C00S H00 0.9900 . ? 
C00S H00| 0.9900 . ? 
C00T H0AA 0.9800 . ? 
C00T H1AA 0.9800 . ? 
C00T H00~ 0.9800 . ? 
C00U H2AA 0.9900 . ? 
C00U H3AA 0.9900 . ? 
C00V H4AA 0.9900 . ? 
C00V H5AA 0.9900 . ? 
 
loop_ 
 _geom_angle_atom_site_label_1 
 _geom_angle_atom_site_label_2 
 _geom_angle_atom_site_label_3 
 _geom_angle 
 _geom_angle_site_symmetry_1 
 _geom_angle_site_symmetry_3 
 _geom_angle_publ_flag 
N003 Fe01 N002 79.75(6) . . ? 
N003 Fe01 C00B 146.67(7) . . ? 
N002 Fe01 C00B 96.70(7) . . ? 
N003 Fe01 C00C 97.88(7) . . ? 
N002 Fe01 C00C 148.69(8) . . ? 
C00B Fe01 C00C 101.40(8) . . ? 
N003 Fe01 C00E 117.83(7) . . ? 
N002 Fe01 C00E 124.33(8) . . ? 
C00B Fe01 C00E 38.89(8) . . ? 
C00C Fe01 C00E 84.64(8) . . ? 
N003 Fe01 C00I 125.78(8) . . ? 
N002 Fe01 C00I 119.19(7) . . ? 
C00B Fe01 C00I 85.09(8) . . ? 
C00C Fe01 C00I 38.86(8) . . ? 
C00E Fe01 C00I 93.49(8) . . ? 
C00A N002 C006 119.60(15) . . ? 
C00A N002 Fe01 114.65(12) . . ? 
C006 N002 Fe01 124.24(12) . . ? 
C008 N003 C005 119.97(16) . . ? 
C008 N003 Fe01 115.21(12) . . ? 
C005 N003 Fe01 123.59(12) . . ? 
C00F C004 C005 119.17(19) . . ? 
C00F C004 C00L 120.34(18) . . ? 
C005 C004 C00L 120.49(18) . . ? 
C004 C005 C007 120.39(18) . . ? 
C004 C005 N003 119.39(18) . . ? 
C007 C005 N003 120.09(17) . . ? 
C00J C006 C009 120.78(18) . . ? 
C00J C006 N002 120.43(16) . . ? 
C009 C006 N002 118.62(17) . . ? 
C00K C007 C005 118.86(18) . . ? 
C00K C007 C00Q 119.95(19) . . ? 
C005 C007 C00Q 121.17(18) . . ? 
N003 C008 C00A 114.90(17) . . ? 
N003 C008 C00R 122.46(17) . . ? 
C00A C008 C00R 122.64(17) . . ? 
C00G C009 C006 118.52(19) . . ? 
C00G C009 C00O 120.23(17) . . ? 
C006 C009 C00O 121.24(18) . . ? 
N002 C00A C008 115.20(17) . . ? 
N002 C00A C00T 122.33(17) . . ? 
C008 C00A C00T 122.46(18) . . ? 
C00E C00B C00P 126.10(18) . . ? 
C00E C00B Fe01 71.16(12) . . ? 
C00P C00B Fe01 107.51(14) . . ? 
C00E C00B H00B 114.3 . . ? 
C00P C00B H00B 114.3 . . ? 
Fe01 C00B H00B 114.3 . . ? 
C00I C00C C00U 125.5(2) . . ? 
C00I C00C Fe01 70.67(11) . . ? 
C00U C00C Fe01 108.44(14) . . ? 
C00I C00C H00C 114.4 . . ? 
C00U C00C H00C 114.4 . . ? 
Fe01 C00C H00C 114.4 . . ? 
C00F C00D C00K 119.90(18) . . ? 
C00F C00D H00D 120.0 . . ? 
C00K C00D H00D 120.0 . . ? 
C00B C00E C00S 123.59(19) . . ? 
C00B C00E Fe01 69.96(12) . . ? 
C00S C00E Fe01 111.26(14) . . ? 
C00B C00E H00E 114.6 . . ? 
C00S C00E H00E 114.6 . . ? 
Fe01 C00E H00E 114.6 . . ? 
C00D C00F C004 120.92(18) . . ? 
C00D C00F H00F 119.5 . . ? 
C004 C00F H00F 119.5 . . ? 
C00N C00G C009 121.10(18) . . ? 
C00N C00G H00G 119.4 . . ? 
C009 C00G H00G 119.4 . . ? 
C00N C00H C00J 120.90(19) . . ? 
C00N C00H H00H 119.5 . . ? 
C00J C00H H00H 119.5 . . ? 
C00C C00I C00V 123.4(2) . . ? 
C00C C00I Fe01 70.47(11) . . ? 
C00V C00I Fe01 110.64(14) . . ? 
C00C C00I H00I 114.7 . . ? 
C00V C00I H00I 114.7 . . ? 
Fe01 C00I H00I 114.7 . . ? 
C00H C00J C006 118.74(17) . . ? 
C00H C00J C00M 119.52(18) . . ? 
C006 C00J C00M 121.73(17) . . ? 
C00D C00K C007 120.7(2) . . ? 
C00D C00K H00K 119.6 . . ? 
C007 C00K H00K 119.6 . . ? 
C004 C00L H00A 109.5 . . ? 
C004 C00L H00J 109.5 . . ? 
H00A C00L H00J 109.5 . . ? 
C004 C00L H00L 109.5 . . ? 
H00A C00L H00L 109.5 . . ? 
H00J C00L H00L 109.5 . . ? 
C00J C00M H00M 109.5 . . ? 
C00J C00M H00N 109.5 . . ? 
H00M C00M H00N 109.5 . . ? 
C00J C00M H00O 109.5 . . ? 
H00M C00M H00O 109.5 . . ? 
H00N C00M H00O 109.5 . . ? 
C00G C00N C00H 119.95(18) . . ? 
C00G C00N H00P 120.0 . . ? 
C00H C00N H00P 120.0 . . ? 
C009 C00O H00Q 109.5 . . ? 
C009 C00O H00R 109.5 . . ? 
H00Q C00O H00R 109.5 . . ? 
C009 C00O H00S 109.5 . . ? 
H00Q C00O H00S 109.5 . . ? 
H00R C00O H00S 109.5 . . ? 
C00B C00P C00V 113.88(17) . . ? 
C00B C00P H00T 108.8 . . ? 
C00V C00P H00T 108.8 . . ? 
C00B C00P H00U 108.8 . . ? 
C00V C00P H00U 108.8 . . ? 
H00T C00P H00U 107.7 . . ? 
C007 C00Q H00V 109.5 . . ? 
C007 C00Q H00W 109.5 . . ? 
H00V C00Q H00W 109.5 . . ? 
C007 C00Q H00X 109.5 . . ? 
H00V C00Q H00X 109.5 . . ? 
H00W C00Q H00X 109.5 . . ? 
C008 C00R H00Y 109.5 . . ? 
C008 C00R H00Z 109.5 . . ? 
H00Y C00R H00Z 109.5 . . ? 
C008 C00R H00{ 109.5 . . ? 
H00Y C00R H00{ 109.5 . . ? 
H00Z C00R H00{ 109.5 . . ? 
C00E C00S C00U 112.62(18) . . ? 
C00E C00S H00 109.1 . . ? 
C00U C00S H00 109.1 . . ? 
C00E C00S H00| 109.1 . . ? 
C00U C00S H00| 109.1 . . ? 
H00 C00S H00| 107.8 . . ? 
C00A C00T H0AA 109.5 . . ? 
C00A C00T H1AA 109.5 . . ? 
H0AA C00T H1AA 109.5 . . ? 
C00A C00T H00~ 109.5 . . ? 
H0AA C00T H00~ 109.5 . . ? 
H1AA C00T H00~ 109.5 . . ? 
C00C C00U C00S 113.75(17) . . ? 
C00C C00U H2AA 108.8 . . ? 
C00S C00U H2AA 108.8 . . ? 
C00C C00U H3AA 108.8 . . ? 
C00S C00U H3AA 108.8 . . ? 
H2AA C00U H3AA 107.7 . . ? 
C00I C00V C00P 112.28(17) . . ? 
C00I C00V H4AA 109.1 . . ? 
C00P C00V H4AA 109.1 . . ? 
C00I C00V H5AA 109.1 . . ? 
C00P C00V H5AA 109.1 . . ? 
H4AA C00V H5AA 107.9 . . ? 
 
_diffrn_measured_fraction_theta_max    0.998 
_diffrn_reflns_theta_full              25.71 
_diffrn_measured_fraction_theta_full   0.998 
_refine_diff_density_max    0.405 
_refine_diff_density_min   -0.321 
_refine_diff_density_rms    0.075 

data_Complex_2_isomer
_audit_creation_date              2015-11-13
_audit_creation_method
;
Olex2 1.2
(compiled 2015.01.26 svn.r3150 for OlexSys, GUI svn.r4998)
;
_publ_contact_author_address      ?
_publ_contact_author_email        ?
_publ_contact_author_name         ''
_publ_contact_author_phone        ?
_publ_section_references
;
Bourhis, L.J., Dolomanov, O.V., Gildea, R.J., Howard, J.A.K., Puschmann, H.
 (2015). Acta Cryst. A71, 59-75.

Dolomanov, O.V., Bourhis, L.J., Gildea, R.J, Howard, J.A.K. & Puschmann, H.
 (2009), J. Appl. Cryst. 42, 339-341.
;
_chemical_formula_moiety          'C28 H36 Fe N2'
_chemical_formula_sum             'C28 H36 Fe N2'
_chemical_formula_weight          456.46
loop_
  _atom_type_symbol
  _atom_type_scat_dispersion_real
  _atom_type_scat_dispersion_imag
  _atom_type_scat_Cromer_Mann_a1
  _atom_type_scat_Cromer_Mann_a2
  _atom_type_scat_Cromer_Mann_a3
  _atom_type_scat_Cromer_Mann_a4
  _atom_type_scat_Cromer_Mann_b1
  _atom_type_scat_Cromer_Mann_b2
  _atom_type_scat_Cromer_Mann_b3
  _atom_type_scat_Cromer_Mann_b4
  _atom_type_scat_Cromer_Mann_c
  _atom_type_scat_source
  _atom_type_scat_dispersion_source
 H 0.00000 0.00000 0.49300 0.32291 0.14019 0.04081 10.51090 26.12570 3.14236
 57.79970 0.0030380000826
 'International Tables Volume C Table 6.1.1.4 (pp. 500-502)'
 'Henke, Gullikson and Davis, At. Data and Nucl. Data Tables, 1993, 54, 2'
 C 0.00347 0.00161 2.31000 1.02000 1.58860 0.86500 20.84390 10.20750 0.56870
 51.65120 0.215599998832
 'International Tables Volume C Table 6.1.1.4 (pp. 500-502)'
 'Henke, Gullikson and Davis, At. Data and Nucl. Data Tables, 1993, 54, 2'
 Fe 0.35822 0.84933 11.76950 7.35730 3.52220 2.30450 4.76110 0.30720 15.35350
 76.88050 1.03690004349
 'International Tables Volume C Table 6.1.1.4 (pp. 500-502)'
 'Henke, Gullikson and Davis, At. Data and Nucl. Data Tables, 1993, 54, 2'
 N 0.00653 0.00323 12.21260 3.13220 2.01250 1.16630 0.00570 9.89330 28.99750
 0.58260 -11.5290002823
 'International Tables Volume C Table 6.1.1.4 (pp. 500-502)'
 'Henke, Gullikson and Davis, At. Data and Nucl. Data Tables, 1993, 54, 2'

_space_group_crystal_system       'monoclinic'
_space_group_IT_number            15
_space_group_name_H-M_alt         'C 1 2/c 1'
_space_group_name_Hall            '-C 2yc'
loop_
  _space_group_symop_id
  _space_group_symop_operation_xyz
 1 x,y,z
 2 -x,y,-z+1/2
 3 -x,-y,-z
 4 x,-y,z-1/2
 5 x+1/2,y+1/2,z
 6 -x+1/2,y+1/2,-z+1/2
 7 -x+1/2,-y+1/2,-z
 8 x+1/2,-y+1/2,z-1/2

_symmetry_Int_Tables_number       15
_cell_length_a                    13.760(1)
_cell_length_b                    13.7555(10)
_cell_length_c                    12.8368(10)
_cell_angle_alpha                 90
_cell_angle_beta                  97.542(2)
_cell_angle_gamma                 90
_cell_volume                      2408.7(3)
_cell_formula_units_Z             4
_cell_measurement_reflns_used     1650
_cell_measurement_temperature     100
_cell_measurement_theta_max       20.19
_cell_measurement_theta_min       2.52
_exptl_absorpt_coefficient_mu     0.643
_exptl_absorpt_correction_T_max   0.9645
_exptl_absorpt_correction_T_min   0.7719
_exptl_absorpt_correction_type    multi-scan
_exptl_absorpt_process_details    'SADABS (Sheldrick, 2009)'
_exptl_crystal_colour             red
_exptl_crystal_colour_primary     red
_exptl_crystal_density_diffrn     1.2586
_exptl_crystal_description        plate
_exptl_crystal_F_000              977.7021
_exptl_crystal_recrystallization_method ?
_exptl_crystal_size_max           0.6
_exptl_crystal_size_mid           0.33
_exptl_crystal_size_min           0.22
_diffrn_reflns_av_R_equivalents   0.0577
_diffrn_reflns_av_unetI/netI      0.0853
_diffrn_reflns_limit_h_max        16
_diffrn_reflns_limit_h_min        -16
_diffrn_reflns_limit_k_max        16
_diffrn_reflns_limit_k_min        -16
_diffrn_reflns_limit_l_max        15
_diffrn_reflns_limit_l_min        -15
_diffrn_reflns_number             10107
_diffrn_reflns_theta_full         25.8353
_diffrn_reflns_theta_max          25.84
_diffrn_reflns_theta_min          2.10
_diffrn_ambient_temperature       100.0
_diffrn_measured_fraction_theta_full 0.9991
_diffrn_measured_fraction_theta_max 0.9991
_diffrn_measurement_device_type   'Bruker APEX-II CCD'
_diffrn_measurement_method        '\f and \w scans'
_diffrn_radiation_type            'Mo K\a'
_diffrn_radiation_wavelength      0.71073
_diffrn_special_details           ?
_diffrn_standards_number          0
_reflns_Friedel_coverage          0.0
_reflns_limit_h_max               16
_reflns_limit_h_min               -16
_reflns_limit_k_max               16
_reflns_limit_k_min               0
_reflns_limit_l_max               15
_reflns_limit_l_min               0
_reflns_number_gt                 1601
_reflns_number_total              2324
_reflns_threshold_expression      I>=2u(I)
_computing_data_collection	  'APEX2 v2009. 3. 0 (Bruker-AXS, 2009)'
_computing_cell_refinement	  'SAINT 7.46A (Bruker-AXS, 2009)'
_computing_data_reduction	  'SAINT 7.46A (Bruker-AXS, 2009)'
_computing_structure_solution     'SHELXL-97 (Sheldrick, 2008)'
_computing_structure_refinement   'SHELXL-97 (Sheldrick, 2008)'
_computing_molecular_graphics     'Bruker SHELXTL'
_computing_publication_material   'Bruker SHELXTL'

_refine_diff_density_max          0.5793
_refine_diff_density_min          -0.4473
_refine_diff_density_rms          0.0926
_refine_ls_d_res_high             0.8155
_refine_ls_d_res_low              9.6859
_refine_ls_goodness_of_fit_ref    0.8169
_refine_ls_hydrogen_treatment     mixed
_refine_ls_matrix_type            full
_refine_ls_number_constraints     28
_refine_ls_number_parameters      143
_refine_ls_number_reflns          2324
_refine_ls_number_restraints      0
_refine_ls_R_factor_all           0.0575
_refine_ls_R_factor_gt            0.0339
_refine_ls_restrained_S_all       0.8169
_refine_ls_shift/su_max           0.0000
_refine_ls_shift/su_mean          0.0000
_refine_ls_structure_factor_coef  Fsqd
_refine_ls_weighting_details
'w=1/[\s^2^(Fo^2^)+(0.0320P)^2^] where P=(Fo^2^+2Fc^2^)/3'
_refine_ls_weighting_scheme       calc
_refine_ls_wR_factor_gt           0.0658
_refine_ls_wR_factor_ref          0.0695
_refine_special_details
;
Refinement of F^2^ agains ALL reflections. The weighted R-factor wR and 
goodness of fit S are based on F^2^, conventional R-factors R are based 
on F, with F set to zero for negative F^2^. The threshold expression of 
F^2^ > 2sigma(F^2^) is used only for calculating R-factors(gt) etc. and is 
not relevant to the choice of reflections for refinement. R-factors based 
on F^2^ are statistically about twice as large as those based on F, and R-
factors based on ALL data will be even larger.
;
_olex2_refinement_description
;
1. Fixed Uiso
 At 1.2 times of:
  All C(H) groups, All C(H,H) groups
 At 1.5 times of:
  All C(H,H,H) groups
2.a Ternary CH refined with riding coordinates:
 C008(H008), C00A(H00d)
2.b Secondary CH2 refined with riding coordinates:
 C00F(H00m,H00n), C00G(H00o,H00p)
2.c Aromatic/amide H refined with riding coordinates:
 C009(H009), C00B(H00e), C00C(H00f)
2.d Idealised Me refined as rotating group:
 C007(H00a,H00b,H00c), C00D(H00g,H00h,H00i), C00E(H00j,H00k,H00l)
;
loop_
  _atom_site_label
  _atom_site_type_symbol
  _atom_site_fract_x
  _atom_site_fract_y
  _atom_site_fract_z
  _atom_site_U_iso_or_equiv
  _atom_site_adp_type
  _atom_site_occupancy
  _atom_site_site_symmetry_order
  _atom_site_refinement_flags_posn
  _atom_site_refinement_flags_adp
  _atom_site_refinement_flags_occupancy
 Fe01 Fe 0.5 0.28927(3) 0.75 0.01811(14) Uani 1.000000 2 S T P
 N002 N 0.58812(12) 0.40052(12) 0.73108(13) 0.0142(4) Uani 1.000000 1 . . .
 C003 C 0.54819(14) 0.48957(15) 0.73649(15) 0.0141(5) Uani 1.000000 1 . . .
 C004 C 0.68208(16) 0.38891(14) 0.69596(17) 0.0163(5) Uani 1.000000 1 . . .
 C005 C 0.68870(16) 0.38530(15) 0.58781(17) 0.0169(5) Uani 1.000000 1 . . .
 C006 C 0.76511(16) 0.37480(15) 0.77021(17) 0.0195(5) Uani 1.000000 1 . . .
 C007 C 0.60291(15) 0.57959(15) 0.71350(17) 0.0208(5) Uani 1.000000 1 . . .
 H00a H 0.6151(8) 0.5787(4) 0.6400(3) 0.0312(8) Uiso 1.000000 1 GR . .
 H00b H 0.5638(4) 0.63700(15) 0.7259(9) 0.0312(8) Uiso 1.000000 1 GR . .
 H00c H 0.6656(4) 0.5819(5) 0.7596(7) 0.0312(8) Uiso 1.000000 1 GR . .
 C008 C 0.54562(16) 0.18414(15) 0.64853(17) 0.0229(6) Uani 1.000000 1 . . .
 H008 H 0.58068(16) 0.21109(15) 0.59145(17) 0.0275(7) Uiso 1.000000 1 R . .
 C009 C 0.85401(16) 0.35465(15) 0.73364(19) 0.0255(6) Uani 1.000000 1 . . .
 H009 H 0.91085(16) 0.34425(15) 0.78291(19) 0.0306(7) Uiso 1.000000 1 R . .
 C00A C 0.44409(16) 0.19373(16) 0.63034(17) 0.0239(6) Uani 1.000000 1 . . .
 H00d H 0.41864(16) 0.22584(16) 0.56231(17) 0.0287(7) Uiso 1.000000 1 R . .
 C00B C 0.77934(17) 0.36487(15) 0.55593(19) 0.0243(6) Uani 1.000000 1 . . .
 H00e H 0.78476(17) 0.36146(15) 0.48301(19) 0.0292(7) Uiso 1.000000 1 R . .
 C00C C 0.86142(17) 0.34946(16) 0.6279(2) 0.0278(6) Uani 1.000000 1 . . .
 H00f H 0.92266(17) 0.33536(16) 0.6046(2) 0.0333(7) Uiso 1.000000 1 R . .
 C00D C 0.60071(16) 0.40140(16) 0.50741(17) 0.0239(6) Uani 1.000000 1 . . .
 H00g H 0.54149(19) 0.3808(9) 0.5362(4) 0.0358(9) Uiso 1.000000 1 GR . .
 H00h H 0.5956(6) 0.4706(2) 0.4892(8) 0.0358(9) Uiso 1.000000 1 GR . .
 H00i H 0.6076(5) 0.3634(7) 0.4442(4) 0.0358(9) Uiso 1.000000 1 GR . .
 C00E C 0.75851(17) 0.38224(17) 0.88625(17) 0.0286(6) Uani 1.000000 1 . . .
 H00j H 0.7314(9) 0.4457(4) 0.9016(2) 0.0429(9) Uiso 1.000000 1 GR . .
 H00k H 0.7158(8) 0.3306(6) 0.9068(3) 0.0429(9) Uiso 1.000000 1 GR . .
 H00l H 0.8241(2) 0.3752(10) 0.92573(18) 0.0429(9) Uiso 1.000000 1 GR . .
 C00F C 0.37202(18) 0.12744(18) 0.67355(18) 0.0323(6) Uani 1.000000 1 . . .
 H00m H 0.30681(18) 0.15903(18) 0.66495(18) 0.0388(8) Uiso 1.000000 1 R . .
 H00n H 0.36632(18) 0.06653(18) 0.63211(18) 0.0388(8) Uiso 1.000000 1 R . .
 C00G C 0.59887(18) 0.10227(17) 0.71000(18) 0.0310(6) Uani 1.000000 1 . . .
 H00o H 0.55629(18) 0.04399(17) 0.70469(18) 0.0372(8) Uiso 1.000000 1 R . .
 H00p H 0.65867(18) 0.08606(17) 0.67832(18) 0.0372(8) Uiso 1.000000 1 R . .

loop_
  _atom_site_aniso_label
  _atom_site_aniso_U_11
  _atom_site_aniso_U_22
  _atom_site_aniso_U_33
  _atom_site_aniso_U_12
  _atom_site_aniso_U_13
  _atom_site_aniso_U_23
 Fe01 0.0221(3) 0.0137(3) 0.0197(3) -0.000000 0.0071(2) 0.000000
 N002 0.0135(10) 0.0151(10) 0.0145(10) 0.0011(8) 0.0037(8) 0.0006(8)
 C003 0.0162(12) 0.0155(12) 0.0103(11) -0.0003(9) 0.0008(9) -0.0006(10)
 C004 0.0167(12) 0.0102(12) 0.0226(13) -0.0009(9) 0.0047(10) 0.0008(10)
 C005 0.0168(13) 0.0134(12) 0.0213(13) -0.0004(9) 0.0058(10) 0.0002(10)
 C006 0.0206(13) 0.0154(13) 0.0218(13) -0.0011(10) 0.0001(11) -0.0026(10)
 C007 0.0193(13) 0.0190(13) 0.0248(14) -0.0017(10) 0.0054(11) -0.0013(10)
 C008 0.0308(14) 0.0186(14) 0.0210(13) 0.0015(10) 0.0096(11) -0.0026(10)
 C009 0.0143(13) 0.0213(14) 0.0390(16) 0.0015(10) -0.0035(11) -0.0027(12)
 C00A 0.0278(14) 0.0259(15) 0.0180(13) -0.0039(11) 0.0030(10) -0.0033(10)
 C00B 0.0272(14) 0.0217(13) 0.0263(14) -0.0019(11) 0.0119(11) -0.0033(11)
 C00C 0.0170(13) 0.0259(14) 0.0421(16) -0.0005(11) 0.0106(12) -0.0081(12)
 C00D 0.0250(14) 0.0293(14) 0.0180(13) 0.0031(11) 0.0051(11) 0.0027(11)
 C00E 0.0264(15) 0.0305(15) 0.0269(14) -0.0010(11) -0.0035(11) 0.0007(12)
 C00F 0.0332(16) 0.0321(15) 0.0315(15) -0.0080(12) 0.0038(12) -0.0032(12)
 C00G 0.0374(16) 0.0281(15) 0.0297(15) 0.0084(12) 0.0127(12) 0.0015(12)

loop_
  _geom_bond_atom_site_label_1
  _geom_bond_atom_site_label_2
  _geom_bond_distance
  _geom_bond_site_symmetry_2
  _geom_bond_publ_flag
 Fe01 N002 1.9871(17) 2_656 ?
 Fe01 N002 1.9871(17) . ?
 Fe01 C008 2.097(2) . ?
 Fe01 C008 2.097(2) 2_656 ?
 Fe01 C00A 2.090(2) . ?
 Fe01 C00A 2.090(2) 2_656 ?
 N002 C003 1.348(2) . ?
 N002 C004 1.433(3) . ?
 C003 C003 1.414(4) 2_656 ?
 C003 C007 1.499(3) . ?
 C004 C005 1.404(3) . ?
 C004 C006 1.402(3) . ?
 C005 C00B 1.391(3) . ?
 C005 C00D 1.501(3) . ?
 C006 C009 1.394(3) . ?
 C006 C00E 1.508(3) . ?
 C007 H00a 0.9800 . ?
 C007 H00b 0.9800 . ?
 C007 H00c 0.9800 . ?
 C008 H008 1.0000 . ?
 C008 C00A 1.392(3) . ?
 C008 C00G 1.509(3) . ?
 C009 H009 0.9500 . ?
 C009 C00C 1.377(3) . ?
 C00A H00d 1.0000 . ?
 C00A C00F 1.506(3) . ?
 C00B H00e 0.9500 . ?
 C00B C00C 1.378(3) . ?
 C00C H00f 0.9500 . ?
 C00D H00g 0.9800 . ?
 C00D H00h 0.9800 . ?
 C00D H00i 0.9800 . ?
 C00E H00j 0.9800 . ?
 C00E H00k 0.9800 . ?
 C00E H00l 0.9800 . ?
 C00F H00m 0.9900 . ?
 C00F H00n 0.9900 . ?
 C00F C00G 1.536(3) 2_656 ?
 C00G H00o 0.9900 . ?
 C00G H00p 0.9900 . ?

loop_
  _geom_angle_atom_site_label_1
  _geom_angle_atom_site_label_2
  _geom_angle_atom_site_label_3
  _geom_angle
  _geom_angle_site_symmetry_1
  _geom_angle_site_symmetry_3
  _geom_angle_publ_flag
 N002 Fe01 N002 79.27(10) . 2_656 ?
 C008 Fe01 N002 147.60(8) 2_656 . ?
 C008 Fe01 N002 147.60(8) . 2_656 ?
 C008 Fe01 N002 102.59(8) 2_656 2_656 ?
 C008 Fe01 N002 102.59(8) . . ?
 C008 Fe01 C008 92.79(12) . 2_656 ?
 C00A Fe01 N002 124.47(8) 2_656 2_656 ?
 C00A Fe01 N002 113.73(8) 2_656 . ?
 C00A Fe01 N002 124.47(8) . . ?
 C00A Fe01 N002 113.73(8) . 2_656 ?
 C00A Fe01 C008 84.93(9) . 2_656 ?
 C00A Fe01 C008 84.93(9) 2_656 . ?
 C00A Fe01 C008 38.84(8) 2_656 2_656 ?
 C00A Fe01 C008 38.84(8) . . ?
 C00A Fe01 C00A 102.08(13) 2_656 . ?
 C003 N002 Fe01 115.72(13) . 2_656 ?
 C004 N002 Fe01 122.88(13) . 2_656 ?
 C004 N002 C003 120.55(17) . . ?
 C003 C003 N002 114.48(11) 2_656 . ?
 C007 C003 N002 121.46(18) . . ?
 C005 C004 N002 119.56(19) . . ?
 C006 C004 N002 119.35(19) . . ?
 C006 C004 C005 121.0(2) . . ?
 C00B C005 C004 118.4(2) . . ?
 C00D C005 C004 121.57(19) . . ?
 C00D C005 C00B 120.1(2) . . ?
 C009 C006 C004 118.1(2) . . ?
 C00E C006 C004 120.8(2) . . ?
 C00E C006 C009 121.0(2) . . ?
 H00a C007 C003 109.5 . . ?
 H00b C007 C003 109.5 . . ?
 H00b C007 H00a 109.5 . . ?
 H00c C007 C003 109.5 . . ?
 H00c C007 H00a 109.5 . . ?
 H00c C007 H00b 109.5 . . ?
 H008 C008 Fe01 114.33(6) . 2_656 ?
 C00A C008 Fe01 70.32(12) . 2_656 ?
 C00A C008 H008 114.33(13) . . ?
 C00G C008 Fe01 110.75(15) . 2_656 ?
 C00G C008 H008 114.33(13) . . ?
 C00G C008 C00A 124.5(2) . . ?
 H009 C009 C006 119.19(13) . . ?
 C00C C009 C006 121.6(2) . . ?
 C00C C009 H009 119.19(14) . . ?
 C008 C00A Fe01 70.84(12) . . ?
 H00d C00A Fe01 114.65(6) . . ?
 H00d C00A C008 114.65(13) . . ?
 C00F C00A Fe01 107.86(14) . . ?
 C00F C00A C008 125.2(2) . . ?
 C00F C00A H00d 114.65(13) . . ?
 H00e C00B C005 119.28(14) . . ?
 C00C C00B C005 121.4(2) . . ?
 C00C C00B H00e 119.28(14) . . ?
 C00B C00C C009 119.5(2) . . ?
 H00f C00C C009 120.25(14) . . ?
 H00f C00C C00B 120.25(14) . . ?
 H00g C00D C005 109.5 . . ?
 H00h C00D C005 109.5 . . ?
 H00h C00D H00g 109.5 . . ?
 H00i C00D C005 109.5 . . ?
 H00i C00D H00g 109.5 . . ?
 H00i C00D H00h 109.5 . . ?
 H00j C00E C006 109.5 . . ?
 H00k C00E C006 109.5 . . ?
 H00k C00E H00j 109.5 . . ?
 H00l C00E C006 109.5 . . ?
 H00l C00E H00j 109.5 . . ?
 H00l C00E H00k 109.5 . . ?
 H00m C00F C00A 108.92(13) . . ?
 H00n C00F C00A 108.92(12) . . ?
 H00n C00F H00m 107.7 . . ?
 C00G C00F C00A 113.3(2) 2_656 . ?
 C00G C00F H00m 108.92(13) 2_656 . ?
 C00G C00F H00n 108.92(13) 2_656 . ?
 C00F C00G C008 112.81(19) 2_656 . ?
 H00o C00G C008 109.03(13) . . ?
 H00o C00G C00F 109.03(13) . 2_656 ?
 H00p C00G C008 109.03(13) . . ?
 H00p C00G C00F 109.03(13) . 2_656 ?
 H00p C00G H00o 107.8 . . ?

_olex2_submission_special_instructions 'No special instructions were received'

data_Complex3 
 
_audit_creation_method            SHELXL-97 
_chemical_name_systematic 
; 
 ? 
; 
_chemical_name_common             ? 
_chemical_melting_point           ? 
_chemical_formula_moiety          ? 
_chemical_formula_sum 
 'C54 H64 Fe2 N4' 
_chemical_formula_weight          880.79 
 
loop_ 
 _atom_type_symbol 
 _atom_type_description 
 _atom_type_scat_dispersion_real 
 _atom_type_scat_dispersion_imag 
 _atom_type_scat_source 
 'C'  'C'   0.0033   0.0016 
 'International Tables Vol C Tables 4.2.6.8 and 6.1.1.4' 
 'H'  'H'   0.0000   0.0000 
 'International Tables Vol C Tables 4.2.6.8 and 6.1.1.4' 
 'Fe'  'Fe'   0.3463   0.8444 
 'International Tables Vol C Tables 4.2.6.8 and 6.1.1.4' 
 'N'  'N'   0.0061   0.0033 
 'International Tables Vol C Tables 4.2.6.8 and 6.1.1.4' 
 
_symmetry_cell_setting            Triclinic 
_symmetry_space_group_name_H-M    P1
 
loop_ 
 _symmetry_equiv_pos_as_xyz 
 'x, y, z' 
 
_cell_length_a                    8.191(5) 
_cell_length_b                    9.559(7) 
_cell_length_c                    15.583(12) 
_cell_angle_alpha                 97.767(13) 
_cell_angle_beta                  99.295(16) 
_cell_angle_gamma                 105.53(2) 
_cell_volume                      1139.4(14) 
_cell_formula_units_Z             1 
_cell_measurement_temperature     100(2) 
_cell_measurement_reflns_used     19454 
_cell_measurement_theta_min       2.25 
_cell_measurement_theta_max       25.7 
 
_exptl_crystal_description        plate 
_exptl_crystal_colour             red 
_exptl_crystal_size_max           0.36 
_exptl_crystal_size_mid           0.18 
_exptl_crystal_size_min           0.05 
_exptl_crystal_density_meas       ? 
_exptl_crystal_density_diffrn     1.284 
_exptl_crystal_density_method     'not measured' 
_exptl_crystal_F_000              468 
_exptl_absorpt_coefficient_mu     0.677 
_exptl_absorpt_correction_type    multi-scan 
_exptl_absorpt_correction_T_min   0.7925 
_exptl_absorpt_correction_T_max   0.9669 
_exptl_absorpt_process_details    'SADABS (Sheldrick, 2008)' 
 
_exptl_special_details 
; 
 ? 
; 
 
_diffrn_ambient_temperature       100(2) 
_diffrn_radiation_wavelength      0.71073 
_diffrn_radiation_type            MoK\a 
_diffrn_radiation_source          'fine-focus sealed tube' 
_diffrn_radiation_monochromator   graphite 
_diffrn_measurement_device_type   
;
Bruker D8 goniometer with CCD area detector
; 
_diffrn_measurement_method        'phi and omega scans' 
_diffrn_detector_area_resol_mean  ? 
_diffrn_reflns_number             9802 
_diffrn_reflns_av_R_equivalents   0.0474 
_diffrn_reflns_av_sigmaI/netI     0.1332 
_diffrn_reflns_limit_h_min        -9 
_diffrn_reflns_limit_h_max        9 
_diffrn_reflns_limit_k_min        -11 
_diffrn_reflns_limit_k_max        11 
_diffrn_reflns_limit_l_min        -18 
_diffrn_reflns_limit_l_max        18 
_diffrn_reflns_theta_min          2.25 
_diffrn_reflns_theta_max          25.74 
_reflns_number_total              7642 
_reflns_number_gt                 5750 
_reflns_threshold_expression      >2sigma(I) 
 
_computing_data_collection        'APEX2 v2009.3.0' 
_computing_cell_refinement        'SAINT 7.46A (Bruker-AXS, 2009)' 
_computing_data_reduction         'SAINT 7.46A (Bruker-AXS, 2009)'
_computing_structure_solution     'SHELXS-97 (Sheldrick, 2008)' 
_computing_structure_refinement   'SHELXL-97 (Sheldrick, 2008)' 
_computing_molecular_graphics     'Bruker SHELXTL (Sheldrick, 2008)' 
_computing_publication_material   'Bruker SHELXTL (Sheldrick, 2008)' 
 
_refine_special_details 
; 
-Refinement of F^2^ against ALL reflections.  The weighted R-factor wR and 
 goodness of fit S are based on F^2^, conventional R-factors R are based 
 on F, with F set to zero for negative F^2^. The threshold expression of 
 F^2^ > 2sigma(F^2^) is used only for calculating R-factors(gt) etc. and is 
 not relevant to the choice of reflections for refinement.  R-factors based 
 on F^2^ are statistically about twice as large as those based on F, and R- 
 factors based on ALL data will be even larger. 
-The crystal is non-merohedrol twin, but we have refined the structure by using reflections in hkl4 format that is created by Cell_now/Twinabs.
-All non-H atoms, including the disorder fragments were located in difference-Fourier maps, and then refined anisotropically. The restraints on bond lengths and constraints of the atomic displacement parameters on each pair of disorder fragments (SADI and EADP instructions of SHELXL97), as well as the restraints of the atomic displacement parameters (SIMU/DELU instructions of SHELXL97) if necessary, have been applied for the disorder regienment.
; 
 
# start Validation Reply Form
_vrf_PLAT097_Complex3
;
PROBLEM: Large Reported Max.  (Positive) Residual Density       3.04 eA-3  
RESPONSE: Large residual density was due to disordered methyl peak from (eta-6)toluene moiety bound to Fe and it's verified to be less than 7%.
;
_vrf_DIFMX01_Complex3
;
PROBLEM: The maximum difference density is > 0.1*ZMAX*1.00 
RESPONSE: The maximum residual electron density is larger than normally expected due to the disordered methyl peaks of (eta-6)toluene moiety bound to Fe and it's verified to be less than 7%.
;
#end Validation Reply Form

_refine_ls_structure_factor_coef  Fsqd  
_refine_ls_matrix_type            full 
_refine_ls_weighting_scheme       calc  
_refine_ls_weighting_details 
 'calc w=1/[\s^2^(Fo^2^)+(0.1108P)^2^+0.0000P] where P=(Fo^2^+2Fc^2^)/3' 
_atom_sites_solution_primary      direct 
_atom_sites_solution_secondary    difmap 
_atom_sites_solution_hydrogens    geom 
_refine_ls_hydrogen_treatment     mixed 
_refine_ls_extinction_method      none 
_refine_ls_extinction_coef        ? 
_refine_ls_abs_structure_details 
 'Flack H D (1983), Acta Cryst. A39, 876-881' 
_refine_ls_abs_structure_Flack    0.02(3) 
_refine_ls_number_reflns          7642 
_refine_ls_number_parameters      507 
_refine_ls_number_restraints      153 
_refine_ls_R_factor_all           0.1033 
_refine_ls_R_factor_gt            0.0760 
_refine_ls_wR_factor_ref          0.1926 
_refine_ls_wR_factor_gt           0.1767 
_refine_ls_goodness_of_fit_ref    0.991 
_refine_ls_restrained_S_all       0.988 
_refine_ls_shift/su_max           0.002 
_refine_ls_shift/su_mean          0.000 
 
loop_ 
 _atom_site_label 
 _atom_site_type_symbol 
 _atom_site_fract_x 
 _atom_site_fract_y 
 _atom_site_fract_z 
 _atom_site_U_iso_or_equiv 
 _atom_site_adp_type 
 _atom_site_occupancy 
 _atom_site_symmetry_multiplicity 
 _atom_site_calc_flag 
 _atom_site_refinement_flags 
 _atom_site_disorder_assembly 
 _atom_site_disorder_group 
C1 C 0.8127(10) 0.5192(9) 0.9737(5) 0.0221(18) Uani 1 1 d . . . 
H1A H 0.7583 0.4492 1.0086 0.033 Uiso 1 1 calc R . . 
H1B H 0.8095 0.6185 0.9975 0.033 Uiso 1 1 calc R . . 
H1C H 0.9333 0.5198 0.9766 0.033 Uiso 1 1 calc R . . 
C2 C 0.7162(9) 0.4738(8) 0.8793(5) 0.0143(16) Uani 1 1 d . . . 
C3 C 0.6025(10) 0.3350(8) 0.8412(5) 0.0157(17) Uani 1 1 d . . . 
C4 C 0.5526(11) 0.2075(10) 0.8875(6) 0.025(2) Uani 1 1 d . . . 
H4A H 0.6387 0.2234 0.9422 0.037 Uiso 1 1 calc R . . 
H4B H 0.5477 0.1161 0.8489 0.037 Uiso 1 1 calc R . . 
H4C H 0.4387 0.1997 0.9019 0.037 Uiso 1 1 calc R . . 
C5 C 0.1680(10) 0.2793(8) 0.7509(5) 0.0186(17) Uani 1 1 d . . . 
H5A H 0.1992 0.3707 0.7274 0.028 Uiso 1 1 calc R . . 
H5B H 0.2193 0.2996 0.8143 0.028 Uiso 1 1 calc R . . 
H5C H 0.0417 0.2414 0.7420 0.028 Uiso 1 1 calc R . . 
C6 C 0.2376(5) 0.1622(4) 0.7018(3) 0.0165(11) Uani 1 1 d GU . . 
C7 C 0.1183(4) 0.0352(5) 0.6494(3) 0.0187(12) Uani 1 1 d GU . . 
H7 H -0.0022 0.0203 0.6460 0.022 Uiso 1 1 calc R . . 
C8 C 0.1752(5) -0.0699(4) 0.6021(3) 0.0220(12) Uani 1 1 d GU . . 
H8 H 0.0936 -0.1566 0.5664 0.026 Uiso 1 1 calc R . . 
C9 C 0.3515(6) -0.0481(5) 0.6071(3) 0.0203(12) Uani 1 1 d GU . . 
H9 H 0.3904 -0.1199 0.5748 0.024 Uiso 1 1 calc R . . 
C10 C 0.4708(4) 0.0788(5) 0.6595(3) 0.0173(11) Uani 1 1 d GU . . 
C11 C 0.4139(5) 0.1839(4) 0.7068(3) 0.0149(11) Uani 1 1 d GU . . 
C12 C 0.6655(10) 0.1079(9) 0.6673(6) 0.0225(18) Uani 1 1 d . . . 
H12A H 0.7150 0.0830 0.7227 0.034 Uiso 1 1 calc R . . 
H12B H 0.7195 0.2126 0.6671 0.034 Uiso 1 1 calc R . . 
H12C H 0.6872 0.0469 0.6171 0.034 Uiso 1 1 calc R . . 
C13 C 0.5983(9) 0.7961(9) 0.8935(5) 0.0211(18) Uani 1 1 d . . . 
H13A H 0.5891 0.7672 0.9509 0.032 Uiso 1 1 calc R . . 
H13B H 0.5247 0.7152 0.8460 0.032 Uiso 1 1 calc R . . 
H13C H 0.5604 0.8845 0.8903 0.032 Uiso 1 1 calc R . . 
C14 C 0.7845(4) 0.8289(5) 0.8831(3) 0.0139(14) Uani 1 1 d GU . . 
C15 C 0.8936(6) 0.9732(4) 0.9054(3) 0.0206(15) Uani 1 1 d GU . . 
H15 H 0.8513 1.0513 0.9275 0.025 Uiso 1 1 calc R . . 
C16 C 1.0645(5) 1.0033(4) 0.8955(4) 0.0199(15) Uani 1 1 d GU . . 
H16 H 1.1390 1.1020 0.9108 0.024 Uiso 1 1 calc R . . 
C17 C 1.1263(4) 0.8891(5) 0.8631(4) 0.0216(16) Uani 1 1 d GU . . 
H17 H 1.2431 0.9097 0.8563 0.026 Uiso 1 1 calc R . . 
C18 C 1.0173(5) 0.7448(4) 0.8408(3) 0.0139(14) Uani 1 1 d GU . . 
C19 C 0.8464(5) 0.7147(4) 0.8507(3) 0.0128(13) Uani 1 1 d GU . . 
C20 C 1.0866(10) 0.6188(9) 0.8075(5) 0.0228(18) Uani 1 1 d . . . 
H20A H 1.2063 0.6595 0.8011 0.034 Uiso 1 1 calc R . . 
H20B H 1.0147 0.5643 0.7500 0.034 Uiso 1 1 calc R . . 
H20C H 1.0831 0.5519 0.8500 0.034 Uiso 1 1 calc R . . 
C21 C 0.7369(11) 0.6480(9) 0.6372(5) 0.0229(19) Uani 1 1 d . . . 
H21 H 0.8494 0.7171 0.6520 0.027 Uiso 1 1 calc R . . 
C22 C 0.5952(11) 0.6914(9) 0.6626(5) 0.0224(18) Uani 1 1 d . . . 
H22 H 0.6134 0.7886 0.6938 0.027 Uiso 1 1 calc R . . 
C23 C 0.4258(10) 0.5877(9) 0.6407(5) 0.0211(18) Uani 1 1 d . . . 
H23 H 0.3304 0.6142 0.6578 0.025 Uiso 1 1 calc R . . 
C24 C 0.4038(12) 0.4476(9) 0.5941(6) 0.020(2) Uani 1 1 d . . . 
H24 H 0.2910 0.3790 0.5776 0.024 Uiso 1 1 calc R . . 
C25 C 0.5449(10) 0.4043(9) 0.5703(5) 0.0197(18) Uani 1 1 d . . . 
H25 H 0.5260 0.3062 0.5403 0.024 Uiso 1 1 calc R . . 
C26 C 0.7130(12) 0.5042(10) 0.5905(6) 0.022(2) Uani 1 1 d . . . 
C27 C 0.8617(12) 0.4607(11) 0.5615(6) 0.035(2) Uani 1 1 d . . . 
H27A H 0.8686 0.4815 0.5021 0.052 Uiso 1 1 calc R . . 
H27B H 0.8437 0.3549 0.5605 0.052 Uiso 1 1 calc R . . 
H27C H 0.9699 0.5173 0.6030 0.052 Uiso 1 1 calc R . . 
N1 N 0.7332(7) 0.5691(6) 0.8209(4) 0.0114(13) Uani 1 1 d . . . 
N2 N 0.5317(7) 0.3245(7) 0.7544(4) 0.0124(13) Uani 1 1 d . . . 
Fe1 Fe 0.60308(11) 0.49491(10) 0.70471(7) 0.0133(3) Uani 1 1 d . . . 
C31 C 0.3335(10) 0.5357(9) 0.0246(5) 0.0243(19) Uani 1 1 d . . . 
H31A H 0.4559 0.5502 0.0230 0.036 Uiso 1 1 calc R . . 
H31B H 0.2938 0.6108 -0.0023 0.036 Uiso 1 1 calc R . . 
H31C H 0.2647 0.4372 -0.0083 0.036 Uiso 1 1 calc R . . 
C32 C 0.3121(9) 0.5496(8) 0.1193(5) 0.0145(16) Uani 1 1 d . . . 
C33 C 0.2290(9) 0.4340(8) 0.1579(5) 0.0132(16) Uani 1 1 d . . . 
C34 C 0.1408(11) 0.2793(9) 0.1101(5) 0.0216(19) Uani 1 1 d . . . 
H34A H 0.0153 0.2629 0.0969 0.032 Uiso 1 1 calc R . . 
H34B H 0.1681 0.2104 0.1474 0.032 Uiso 1 1 calc R . . 
H34C H 0.1811 0.2630 0.0548 0.032 Uiso 1 1 calc R . . 
C35 C 0.7420(10) 0.7431(9) 0.1899(6) 0.0237(19) Uani 1 1 d . . . 
H35A H 0.7182 0.6558 0.1435 0.036 Uiso 1 1 calc R . . 
H35B H 0.7045 0.7124 0.2428 0.036 Uiso 1 1 calc R . . 
H35C H 0.8666 0.7945 0.2044 0.036 Uiso 1 1 calc R . . 
C36 C 0.6444(5) 0.8461(5) 0.1571(3) 0.0185(17) Uani 1 1 d G . . 
C37 C 0.7343(4) 0.9767(5) 0.1347(4) 0.0224(18) Uani 1 1 d G . . 
H37 H 0.8566 1.0018 0.1411 0.027 Uiso 1 1 calc R . . 
C38 C 0.6455(6) 1.0706(4) 0.1030(4) 0.0192(17) Uani 1 1 d G . . 
H38 H 0.7069 1.1599 0.0877 0.023 Uiso 1 1 calc R . . 
C39 C 0.4666(6) 1.0338(5) 0.0938(4) 0.0200(18) Uani 1 1 d G . . 
H39 H 0.4059 1.0980 0.0721 0.024 Uiso 1 1 calc R . . 
C40 C 0.3767(4) 0.9032(5) 0.1162(3) 0.0125(17) Uani 1 1 d G . . 
C41 C 0.4655(5) 0.8094(4) 0.1479(3) 0.0098(14) Uani 1 1 d G . . 
C42 C 0.1800(10) 0.8623(9) 0.1036(5) 0.0223(18) Uani 1 1 d . . . 
H42A H 0.1383 0.9353 0.0753 0.033 Uiso 1 1 calc R . . 
H42B H 0.1474 0.8610 0.1614 0.033 Uiso 1 1 calc R . . 
H42C H 0.1279 0.7642 0.0661 0.033 Uiso 1 1 calc R . . 
C43 C 0.4313(9) 0.3109(9) 0.3297(6) 0.0213(18) Uani 1 1 d . . . 
H43A H 0.4830 0.2567 0.3700 0.032 Uiso 1 1 calc R . . 
H43B H 0.4964 0.4161 0.3454 0.032 Uiso 1 1 calc R . . 
H43C H 0.4353 0.2724 0.2687 0.032 Uiso 1 1 calc R . . 
C44 C 0.2443(4) 0.2912(5) 0.3373(3) 0.0175(11) Uani 1 1 d GU . . 
C45 C 0.1667(5) 0.1948(5) 0.3883(3) 0.0192(11) Uani 1 1 d GU . . 
H45 H 0.2316 0.1422 0.4199 0.023 Uiso 1 1 calc R . . 
C46 C -0.0058(6) 0.1752(5) 0.3931(3) 0.0204(12) Uani 1 1 d GU . . 
H46 H -0.0588 0.1093 0.4279 0.024 Uiso 1 1 calc R . . 
C47 C -0.1007(4) 0.2521(6) 0.3468(3) 0.0188(11) Uani 1 1 d GU . . 
H47 H -0.2186 0.2388 0.3501 0.023 Uiso 1 1 calc R . . 
C48 C -0.0231(5) 0.3486(5) 0.2958(3) 0.0182(11) Uani 1 1 d GU . . 
C49 C 0.1493(5) 0.3681(5) 0.2911(3) 0.0172(11) Uani 1 1 d GU . . 
C50 C -0.1285(10) 0.4366(9) 0.2478(5) 0.0217(18) Uani 1 1 d . . . 
H50A H -0.2447 0.4126 0.2610 0.033 Uiso 1 1 calc R . . 
H50B H -0.1375 0.4108 0.1839 0.033 Uiso 1 1 calc R . . 
H50C H -0.0703 0.5427 0.2680 0.033 Uiso 1 1 calc R . . 
C51 C 0.5200(11) 0.8843(9) 0.3585(5) 0.0211(18) Uani 1 1 d . . . 
H51 H 0.6140 0.9498 0.3418 0.025 Uiso 1 1 calc R . . 
C52 C 0.3518(10) 0.8995(9) 0.3367(5) 0.0227(18) Uani 1 1 d . . . 
H52 H 0.3339 0.9745 0.3053 0.027 Uiso 1 1 calc R . . 
C53 C 0.2106(10) 0.8046(9) 0.3614(5) 0.0228(19) Uani 1 1 d . . . 
H53 H 0.0979 0.8152 0.3467 0.027 Uiso 1 1 calc R . . 
C54 C 0.2383(12) 0.6932(10) 0.4083(6) 0.019(2) Uani 1 1 d . . . 
H54 H 0.1444 0.6291 0.4258 0.023 Uiso 1 1 calc R . . 
C55 C 0.4047(11) 0.6780(9) 0.4287(5) 0.0197(18) Uani 1 1 d . . . 
H55 H 0.4211 0.6020 0.4595 0.024 Uiso 1 1 calc R . . 
C56 C 0.5505(11) 0.7724(9) 0.4050(6) 0.0168(19) Uani 1 1 d . . . 
C57 C 0.7302(11) 0.7598(10) 0.4290(6) 0.029(2) Uani 1 1 d . . . 
H57A H 0.8018 0.8089 0.3908 0.043 Uiso 1 1 calc R . . 
H57B H 0.7254 0.6552 0.4210 0.043 Uiso 1 1 calc R . . 
H57C H 0.7807 0.8070 0.4910 0.043 Uiso 1 1 calc R . . 
N3 N 0.3769(7) 0.6816(6) 0.1775(4) 0.0118(13) Uani 1 1 d . . . 
N4 N 0.2308(8) 0.4784(7) 0.2447(4) 0.0153(14) Uani 1 1 d . . . 
Fe2 Fe 0.34169(10) 0.68034(9) 0.29406(7) 0.0125(3) Uani 1 1 d . . . 
 
loop_ 
 _atom_site_aniso_label 
 _atom_site_aniso_U_11 
 _atom_site_aniso_U_22 
 _atom_site_aniso_U_33 
 _atom_site_aniso_U_23 
 _atom_site_aniso_U_13 
 _atom_site_aniso_U_12 
C1 0.024(5) 0.022(5) 0.018(4) 0.003(4) 0.004(3) 0.003(4) 
C2 0.010(4) 0.019(4) 0.015(4) 0.006(3) 0.003(3) 0.004(3) 
C3 0.021(4) 0.016(4) 0.017(4) 0.009(3) 0.016(3) 0.009(3) 
C4 0.024(5) 0.027(5) 0.025(5) 0.011(4) 0.000(4) 0.011(4) 
C5 0.015(4) 0.014(4) 0.030(5) 0.005(3) 0.008(3) 0.009(3) 
C6 0.0110(19) 0.018(2) 0.018(3) 0.003(2) 0.001(2) 0.0021(19) 
C7 0.012(2) 0.019(3) 0.022(3) 0.002(2) 0.002(2) 0.0005(18) 
C8 0.016(2) 0.018(3) 0.028(3) 0.000(2) 0.001(2) 0.002(2) 
C9 0.016(2) 0.018(2) 0.027(3) 0.004(2) 0.002(2) 0.006(2) 
C10 0.012(2) 0.019(2) 0.021(3) 0.008(2) -0.002(2) 0.0067(17) 
C11 0.0093(16) 0.0230(18) 0.0100(18) 0.0040(14) 0.0036(14) -0.0004(14) 
C12 0.018(4) 0.016(4) 0.031(5) 0.000(4) 0.002(3) 0.005(3) 
C13 0.015(4) 0.024(5) 0.024(4) 0.000(4) 0.004(3) 0.008(4) 
C14 0.011(3) 0.014(3) 0.019(4) 0.006(3) 0.005(3) 0.005(2) 
C15 0.021(3) 0.014(3) 0.025(4) 0.001(3) -0.002(3) 0.007(3) 
C16 0.018(3) 0.013(3) 0.019(4) -0.002(3) -0.001(3) -0.007(3) 
C17 0.013(3) 0.019(3) 0.026(4) 0.001(3) 0.004(3) -0.005(2) 
C18 0.011(3) 0.012(3) 0.018(4) 0.004(3) 0.005(3) 0.001(2) 
C19 0.014(3) 0.010(3) 0.013(3) 0.002(3) 0.003(3) 0.001(2) 
C20 0.014(4) 0.029(5) 0.024(4) -0.007(4) 0.000(3) 0.011(4) 
C21 0.027(5) 0.027(5) 0.012(4) 0.007(4) 0.006(3) 0.000(4) 
C22 0.031(5) 0.021(4) 0.017(4) 0.007(3) 0.003(3) 0.009(4) 
C23 0.016(4) 0.030(5) 0.022(4) 0.012(4) 0.003(3) 0.011(4) 
C24 0.026(5) 0.016(5) 0.014(4) 0.007(4) 0.000(4) 0.000(4) 
C25 0.023(5) 0.017(4) 0.014(4) 0.004(3) -0.009(3) 0.004(4) 
C26 0.024(5) 0.028(5) 0.014(5) 0.003(4) 0.003(4) 0.008(4) 
C27 0.039(6) 0.053(6) 0.029(5) 0.013(5) 0.021(4) 0.028(5) 
N1 0.009(3) 0.009(3) 0.012(3) 0.000(3) -0.001(2) -0.002(3) 
N2 0.009(3) 0.014(3) 0.016(3) 0.007(3) 0.002(2) 0.006(3) 
Fe1 0.0118(6) 0.0131(6) 0.0144(7) 0.0038(5) 0.0008(5) 0.0032(5) 
C31 0.022(5) 0.023(5) 0.027(5) 0.004(4) 0.008(4) 0.005(4) 
C32 0.015(4) 0.018(4) 0.010(4) -0.001(3) -0.001(3) 0.008(3) 
C33 0.018(4) 0.011(4) 0.011(4) 0.003(3) 0.001(3) 0.006(3) 
C34 0.027(5) 0.019(5) 0.018(4) -0.002(4) 0.011(4) 0.004(4) 
C35 0.014(4) 0.032(5) 0.033(5) 0.017(4) 0.008(3) 0.012(4) 
C36 0.013(4) 0.022(4) 0.021(4) 0.009(3) 0.005(3) 0.004(3) 
C37 0.015(4) 0.029(5) 0.025(5) 0.005(4) 0.007(3) 0.008(4) 
C38 0.017(4) 0.010(4) 0.023(4) 0.003(3) -0.003(3) -0.004(3) 
C39 0.031(5) 0.017(4) 0.015(4) 0.009(3) 0.004(4) 0.011(4) 
C40 0.008(4) 0.014(4) 0.011(4) -0.003(3) -0.003(3) 0.001(3) 
C41 0.012(4) 0.009(4) 0.006(3) 0.001(3) 0.001(3) 0.000(3) 
C42 0.018(4) 0.026(5) 0.023(5) 0.005(4) 0.000(3) 0.009(4) 
C43 0.011(4) 0.022(5) 0.033(5) 0.011(4) 0.005(3) 0.004(3) 
C44 0.016(2) 0.021(3) 0.013(3) -0.005(2) 0.0050(19) 0.003(2) 
C45 0.016(2) 0.020(3) 0.018(3) -0.002(2) 0.002(2) 0.003(2) 
C46 0.017(2) 0.019(3) 0.021(3) -0.001(2) 0.006(2) 0.000(2) 
C47 0.013(2) 0.021(3) 0.019(3) -0.002(2) 0.006(2) 0.001(2) 
C48 0.012(2) 0.020(3) 0.017(3) -0.002(2) 0.003(2) 0.000(2) 
C49 0.011(2) 0.026(3) 0.008(3) -0.004(2) 0.0019(19) -0.001(2) 
C50 0.011(4) 0.026(5) 0.026(5) 0.005(4) -0.002(3) 0.005(3) 
C51 0.026(5) 0.014(4) 0.020(4) 0.006(3) 0.005(4) -0.001(4) 
C52 0.027(5) 0.013(4) 0.030(5) 0.005(4) 0.008(4) 0.006(4) 
C53 0.015(4) 0.025(5) 0.028(5) -0.003(4) 0.002(3) 0.011(4) 
C54 0.019(5) 0.016(5) 0.019(5) 0.002(4) 0.009(4) -0.001(4) 
C55 0.037(5) 0.018(4) 0.006(4) 0.003(3) 0.009(3) 0.007(4) 
C56 0.012(4) 0.011(4) 0.020(4) -0.006(3) 0.000(3) -0.003(3) 
C57 0.021(4) 0.036(5) 0.023(5) 0.001(4) -0.004(4) 0.006(4) 
N3 0.010(3) 0.010(3) 0.017(3) 0.006(3) 0.001(2) 0.005(3) 
N4 0.008(3) 0.015(3) 0.026(4) 0.010(3) 0.006(3) 0.004(3) 
Fe2 0.0121(6) 0.0121(6) 0.0136(6) 0.0024(5) 0.0029(5) 0.0043(5) 
 
_geom_special_details 
; 
 All esds (except the esd in the dihedral angle between two l.s. planes) 
 are estimated using the full covariance matrix.  The cell esds are taken 
 into account individually in the estimation of esds in distances, angles 
 and torsion angles; correlations between esds in cell parameters are only 
 used when they are defined by crystal symmetry.  An approximate (isotropic) 
 treatment of cell esds is used for estimating esds involving l.s. planes. 
; 
 
loop_ 
 _geom_bond_atom_site_label_1 
 _geom_bond_atom_site_label_2 
 _geom_bond_distance 
 _geom_bond_site_symmetry_2 
 _geom_bond_publ_flag 
C1 C2 1.499(10) . ? 
C1 H1A 0.9800 . ? 
C1 H1B 0.9800 . ? 
C1 H1C 0.9800 . ? 
C2 N1 1.368(9) . ? 
C2 C3 1.388(11) . ? 
C3 N2 1.361(10) . ? 
C3 C4 1.497(11) . ? 
C4 H4A 0.9800 . ? 
C4 H4B 0.9800 . ? 
C4 H4C 0.9800 . ? 
C5 C6 1.554(8) . ? 
C5 H5A 0.9800 . ? 
C5 H5B 0.9800 . ? 
C5 H5C 0.9800 . ? 
C6 C7 1.3900 . ? 
C6 C11 1.3900 . ? 
C7 C8 1.3900 . ? 
C7 H7 0.9500 . ? 
C8 C9 1.3900 . ? 
C8 H8 0.9500 . ? 
C9 C10 1.3900 . ? 
C9 H9 0.9500 . ? 
C10 C11 1.3900 . ? 
C10 C12 1.525(8) . ? 
C11 N2 1.446(7) . ? 
C12 H12A 0.9800 . ? 
C12 H12B 0.9800 . ? 
C12 H12C 0.9800 . ? 
C13 C14 1.513(8) . ? 
C13 H13A 0.9800 . ? 
C13 H13B 0.9800 . ? 
C13 H13C 0.9800 . ? 
C14 C15 1.3900 . ? 
C14 C19 1.3900 . ? 
C15 C16 1.3900 . ? 
C15 H15 0.9500 . ? 
C16 C17 1.3900 . ? 
C16 H16 0.9500 . ? 
C17 C18 1.3900 . ? 
C17 H17 0.9500 . ? 
C18 C19 1.3900 . ? 
C18 C20 1.528(8) . ? 
C19 N1 1.417(7) . ? 
C20 H20A 0.9800 . ? 
C20 H20B 0.9800 . ? 
C20 H20C 0.9800 . ? 
C21 C26 1.413(12) . ? 
C21 C22 1.427(11) . ? 
C21 Fe1 2.092(8) . ? 
C21 H21 0.9500 . ? 
C22 C23 1.430(12) . ? 
C22 Fe1 2.085(8) . ? 
C22 H22 0.9500 . ? 
C23 C24 1.385(12) . ? 
C23 Fe1 2.085(7) . ? 
C23 H23 0.9500 . ? 
C24 C25 1.413(12) . ? 
C24 Fe1 2.080(9) . ? 
C24 H24 0.9500 . ? 
C25 C26 1.407(12) . ? 
C25 Fe1 2.080(8) . ? 
C25 H25 0.9500 . ? 
C26 C27 1.504(12) . ? 
C26 Fe1 2.122(9) . ? 
C27 H27A 0.9800 . ? 
C27 H27B 0.9800 . ? 
C27 H27C 0.9800 . ? 
N1 Fe1 1.882(6) . ? 
N2 Fe1 1.890(6) . ? 
C31 C32 1.505(11) . ? 
C31 H31A 0.9800 . ? 
C31 H31B 0.9800 . ? 
C31 H31C 0.9800 . ? 
C32 N3 1.369(9) . ? 
C32 C33 1.398(10) . ? 
C33 N4 1.357(9) . ? 
C33 C34 1.489(11) . ? 
C34 H34A 0.9800 . ? 
C34 H34B 0.9800 . ? 
C34 H34C 0.9800 . ? 
C35 C36 1.515(8) . ? 
C35 H35A 0.9800 . ? 
C35 H35B 0.9800 . ? 
C35 H35C 0.9800 . ? 
C36 C37 1.3900 . ? 
C36 C41 1.3900 . ? 
C37 C38 1.3900 . ? 
C37 H37 0.9500 . ? 
C38 C39 1.3900 . ? 
C38 H38 0.9500 . ? 
C39 C40 1.3900 . ? 
C39 H39 0.9500 . ? 
C40 C41 1.3900 . ? 
C40 C42 1.525(8) . ? 
C41 N3 1.420(7) . ? 
C42 H42A 0.9800 . ? 
C42 H42B 0.9800 . ? 
C42 H42C 0.9800 . ? 
C43 C44 1.519(8) . ? 
C43 H43A 0.9800 . ? 
C43 H43B 0.9800 . ? 
C43 H43C 0.9800 . ? 
C44 C45 1.3900 . ? 
C44 C49 1.3900 . ? 
C45 C46 1.3900 . ? 
C45 H45 0.9500 . ? 
C46 C47 1.3900 . ? 
C46 H46 0.9500 . ? 
C47 C48 1.3900 . ? 
C47 H47 0.9500 . ? 
C48 C49 1.3900 . ? 
C48 C50 1.537(8) . ? 
C49 N4 1.437(7) . ? 
C50 H50A 0.9800 . ? 
C50 H50B 0.9800 . ? 
C50 H50C 0.9800 . ? 
C51 C52 1.416(11) . ? 
C51 C56 1.423(12) . ? 
C51 Fe2 2.101(8) . ? 
C51 H51 0.9500 . ? 
C52 C53 1.408(11) . ? 
C52 Fe2 2.086(8) . ? 
C52 H52 0.9500 . ? 
C53 C54 1.416(12) . ? 
C53 Fe2 2.092(8) . ? 
C53 H53 0.9500 . ? 
C54 C55 1.399(12) . ? 
C54 Fe2 2.094(9) . ? 
C54 H54 0.9500 . ? 
C55 C56 1.426(11) . ? 
C55 Fe2 2.083(8) . ? 
C55 H55 0.9500 . ? 
C56 C57 1.500(12) . ? 
C56 Fe2 2.125(8) . ? 
C57 H57A 0.9800 . ? 
C57 H57B 0.9800 . ? 
C57 H57C 0.9800 . ? 
N3 Fe2 1.886(6) . ? 
N4 Fe2 1.892(7) . ? 
 
loop_ 
 _geom_angle_atom_site_label_1 
 _geom_angle_atom_site_label_2 
 _geom_angle_atom_site_label_3 
 _geom_angle 
 _geom_angle_site_symmetry_1 
 _geom_angle_site_symmetry_3 
 _geom_angle_publ_flag 
C2 C1 H1A 109.5 . . ? 
C2 C1 H1B 109.5 . . ? 
H1A C1 H1B 109.5 . . ? 
C2 C1 H1C 109.5 . . ? 
H1A C1 H1C 109.5 . . ? 
H1B C1 H1C 109.5 . . ? 
N1 C2 C3 112.8(6) . . ? 
N1 C2 C1 122.0(7) . . ? 
C3 C2 C1 125.3(7) . . ? 
N2 C3 C2 112.9(6) . . ? 
N2 C3 C4 121.1(7) . . ? 
C2 C3 C4 126.0(7) . . ? 
C3 C4 H4A 109.5 . . ? 
C3 C4 H4B 109.5 . . ? 
H4A C4 H4B 109.5 . . ? 
C3 C4 H4C 109.5 . . ? 
H4A C4 H4C 109.5 . . ? 
H4B C4 H4C 109.5 . . ? 
C6 C5 H5A 109.5 . . ? 
C6 C5 H5B 109.5 . . ? 
H5A C5 H5B 109.5 . . ? 
C6 C5 H5C 109.5 . . ? 
H5A C5 H5C 109.5 . . ? 
H5B C5 H5C 109.5 . . ? 
C7 C6 C11 120.0 . . ? 
C7 C6 C5 118.2(4) . . ? 
C11 C6 C5 121.7(4) . . ? 
C8 C7 C6 120.0 . . ? 
C8 C7 H7 120.0 . . ? 
C6 C7 H7 120.0 . . ? 
C9 C8 C7 120.0 . . ? 
C9 C8 H8 120.0 . . ? 
C7 C8 H8 120.0 . . ? 
C8 C9 C10 120.0 . . ? 
C8 C9 H9 120.0 . . ? 
C10 C9 H9 120.0 . . ? 
C11 C10 C9 120.0 . . ? 
C11 C10 C12 117.9(4) . . ? 
C9 C10 C12 122.1(4) . . ? 
C10 C11 C6 120.0 . . ? 
C10 C11 N2 121.9(4) . . ? 
C6 C11 N2 117.8(4) . . ? 
C10 C12 H12A 109.5 . . ? 
C10 C12 H12B 109.5 . . ? 
H12A C12 H12B 109.5 . . ? 
C10 C12 H12C 109.5 . . ? 
H12A C12 H12C 109.5 . . ? 
H12B C12 H12C 109.5 . . ? 
C14 C13 H13A 109.5 . . ? 
C14 C13 H13B 109.5 . . ? 
H13A C13 H13B 109.5 . . ? 
C14 C13 H13C 109.5 . . ? 
H13A C13 H13C 109.5 . . ? 
H13B C13 H13C 109.5 . . ? 
C15 C14 C19 120.0 . . ? 
C15 C14 C13 120.0(4) . . ? 
C19 C14 C13 120.0(4) . . ? 
C16 C15 C14 120.0 . . ? 
C16 C15 H15 120.0 . . ? 
C14 C15 H15 120.0 . . ? 
C15 C16 C17 120.0 . . ? 
C15 C16 H16 120.0 . . ? 
C17 C16 H16 120.0 . . ? 
C16 C17 C18 120.0 . . ? 
C16 C17 H17 120.0 . . ? 
C18 C17 H17 120.0 . . ? 
C19 C18 C17 120.0 . . ? 
C19 C18 C20 120.0(4) . . ? 
C17 C18 C20 120.0(4) . . ? 
C18 C19 C14 120.0 . . ? 
C18 C19 N1 119.3(4) . . ? 
C14 C19 N1 120.5(4) . . ? 
C18 C20 H20A 109.5 . . ? 
C18 C20 H20B 109.5 . . ? 
H20A C20 H20B 109.5 . . ? 
C18 C20 H20C 109.5 . . ? 
H20A C20 H20C 109.5 . . ? 
H20B C20 H20C 109.5 . . ? 
C26 C21 C22 121.2(8) . . ? 
C26 C21 Fe1 71.5(5) . . ? 
C22 C21 Fe1 69.8(4) . . ? 
C26 C21 H21 119.4 . . ? 
C22 C21 H21 119.4 . . ? 
Fe1 C21 H21 132.5 . . ? 
C21 C22 C23 119.6(8) . . ? 
C21 C22 Fe1 70.3(4) . . ? 
C23 C22 Fe1 70.0(4) . . ? 
C21 C22 H22 120.2 . . ? 
C23 C22 H22 120.2 . . ? 
Fe1 C22 H22 132.5 . . ? 
C24 C23 C22 118.6(8) . . ? 
C24 C23 Fe1 70.4(5) . . ? 
C22 C23 Fe1 69.9(4) . . ? 
C24 C23 H23 120.7 . . ? 
C22 C23 H23 120.7 . . ? 
Fe1 C23 H23 131.7 . . ? 
C23 C24 C25 121.6(8) . . ? 
C23 C24 Fe1 70.8(5) . . ? 
C25 C24 Fe1 70.2(5) . . ? 
C23 C24 H24 119.2 . . ? 
C25 C24 H24 119.2 . . ? 
Fe1 C24 H24 133.3 . . ? 
C26 C25 C24 121.0(8) . . ? 
C26 C25 Fe1 72.0(5) . . ? 
C24 C25 Fe1 70.1(5) . . ? 
C26 C25 H25 119.5 . . ? 
C24 C25 H25 119.5 . . ? 
Fe1 C25 H25 131.2 . . ? 
C25 C26 C21 117.9(8) . . ? 
C25 C26 C27 121.1(8) . . ? 
C21 C26 C27 121.0(8) . . ? 
C25 C26 Fe1 68.9(5) . . ? 
C21 C26 Fe1 69.3(5) . . ? 
C27 C26 Fe1 135.0(6) . . ? 
C26 C27 H27A 109.5 . . ? 
C26 C27 H27B 109.5 . . ? 
H27A C27 H27B 109.5 . . ? 
C26 C27 H27C 109.5 . . ? 
H27A C27 H27C 109.5 . . ? 
H27B C27 H27C 109.5 . . ? 
C2 N1 C19 118.9(6) . . ? 
C2 N1 Fe1 116.7(5) . . ? 
C19 N1 Fe1 124.4(4) . . ? 
C3 N2 C11 118.1(6) . . ? 
C3 N2 Fe1 116.7(5) . . ? 
C11 N2 Fe1 125.1(4) . . ? 
N1 Fe1 N2 80.9(3) . . ? 
N1 Fe1 C24 160.6(3) . . ? 
N2 Fe1 C24 100.5(3) . . ? 
N1 Fe1 C25 159.3(3) . . ? 
N2 Fe1 C25 101.5(3) . . ? 
C24 Fe1 C25 39.7(3) . . ? 
N1 Fe1 C22 100.5(3) . . ? 
N2 Fe1 C22 158.2(3) . . ? 
C24 Fe1 C22 71.1(3) . . ? 
C25 Fe1 C22 84.9(3) . . ? 
N1 Fe1 C23 124.6(3) . . ? 
N2 Fe1 C23 122.0(3) . . ? 
C24 Fe1 C23 38.8(3) . . ? 
C25 Fe1 C23 71.8(3) . . ? 
C22 Fe1 C23 40.1(3) . . ? 
N1 Fe1 C21 100.6(3) . . ? 
N2 Fe1 C21 161.6(3) . . ? 
C24 Fe1 C21 84.2(3) . . ? 
C25 Fe1 C21 70.8(3) . . ? 
C22 Fe1 C21 39.9(3) . . ? 
C23 Fe1 C21 72.4(3) . . ? 
N1 Fe1 C26 123.5(3) . . ? 
N2 Fe1 C26 125.4(3) . . ? 
C24 Fe1 C26 71.5(4) . . ? 
C25 Fe1 C26 39.1(3) . . ? 
C22 Fe1 C26 72.1(3) . . ? 
C23 Fe1 C26 85.8(3) . . ? 
C21 Fe1 C26 39.2(3) . . ? 
C32 C31 H31A 109.5 . . ? 
C32 C31 H31B 109.5 . . ? 
H31A C31 H31B 109.5 . . ? 
C32 C31 H31C 109.5 . . ? 
H31A C31 H31C 109.5 . . ? 
H31B C31 H31C 109.5 . . ? 
N3 C32 C33 112.8(6) . . ? 
N3 C32 C31 121.7(7) . . ? 
C33 C32 C31 125.5(7) . . ? 
N4 C33 C32 112.7(6) . . ? 
N4 C33 C34 122.4(7) . . ? 
C32 C33 C34 124.9(7) . . ? 
C33 C34 H34A 109.5 . . ? 
C33 C34 H34B 109.5 . . ? 
H34A C34 H34B 109.5 . . ? 
C33 C34 H34C 109.5 . . ? 
H34A C34 H34C 109.5 . . ? 
H34B C34 H34C 109.5 . . ? 
C36 C35 H35A 109.5 . . ? 
C36 C35 H35B 109.5 . . ? 
H35A C35 H35B 109.5 . . ? 
C36 C35 H35C 109.5 . . ? 
H35A C35 H35C 109.5 . . ? 
H35B C35 H35C 109.5 . . ? 
C37 C36 C41 120.0 . . ? 
C37 C36 C35 119.6(4) . . ? 
C41 C36 C35 120.4(4) . . ? 
C36 C37 C38 120.0 . . ? 
C36 C37 H37 120.0 . . ? 
C38 C37 H37 120.0 . . ? 
C39 C38 C37 120.0 . . ? 
C39 C38 H38 120.0 . . ? 
C37 C38 H38 120.0 . . ? 
C38 C39 C40 120.0 . . ? 
C38 C39 H39 120.0 . . ? 
C40 C39 H39 120.0 . . ? 
C39 C40 C41 120.0 . . ? 
C39 C40 C42 119.5(4) . . ? 
C41 C40 C42 120.5(4) . . ? 
C40 C41 C36 120.0 . . ? 
C40 C41 N3 120.4(4) . . ? 
C36 C41 N3 119.4(4) . . ? 
C40 C42 H42A 109.5 . . ? 
C40 C42 H42B 109.5 . . ? 
H42A C42 H42B 109.5 . . ? 
C40 C42 H42C 109.5 . . ? 
H42A C42 H42C 109.5 . . ? 
H42B C42 H42C 109.5 . . ? 
C44 C43 H43A 109.5 . . ? 
C44 C43 H43B 109.5 . . ? 
H43A C43 H43B 109.5 . . ? 
C44 C43 H43C 109.5 . . ? 
H43A C43 H43C 109.5 . . ? 
H43B C43 H43C 109.5 . . ? 
C45 C44 C49 120.0 . . ? 
C45 C44 C43 120.6(4) . . ? 
C49 C44 C43 119.4(4) . . ? 
C46 C45 C44 120.0 . . ? 
C46 C45 H45 120.0 . . ? 
C44 C45 H45 120.0 . . ? 
C45 C46 C47 120.0 . . ? 
C45 C46 H46 120.0 . . ? 
C47 C46 H46 120.0 . . ? 
C48 C47 C46 120.0 . . ? 
C48 C47 H47 120.0 . . ? 
C46 C47 H47 120.0 . . ? 
C47 C48 C49 120.0 . . ? 
C47 C48 C50 119.2(4) . . ? 
C49 C48 C50 120.8(4) . . ? 
C48 C49 C44 120.0 . . ? 
C48 C49 N4 118.8(4) . . ? 
C44 C49 N4 120.9(4) . . ? 
C48 C50 H50A 109.5 . . ? 
C48 C50 H50B 109.5 . . ? 
H50A C50 H50B 109.5 . . ? 
C48 C50 H50C 109.5 . . ? 
H50A C50 H50C 109.5 . . ? 
H50B C50 H50C 109.5 . . ? 
C52 C51 C56 121.0(7) . . ? 
C52 C51 Fe2 69.7(5) . . ? 
C56 C51 Fe2 71.2(5) . . ? 
C52 C51 H51 119.5 . . ? 
C56 C51 H51 119.5 . . ? 
Fe2 C51 H51 132.8 . . ? 
C53 C52 C51 120.6(7) . . ? 
C53 C52 Fe2 70.5(4) . . ? 
C51 C52 Fe2 70.8(5) . . ? 
C53 C52 H52 119.7 . . ? 
C51 C52 H52 119.7 . . ? 
Fe2 C52 H52 132.0 . . ? 
C52 C53 C54 119.3(7) . . ? 
C52 C53 Fe2 70.1(4) . . ? 
C54 C53 Fe2 70.3(5) . . ? 
C52 C53 H53 120.3 . . ? 
C54 C53 H53 120.3 . . ? 
Fe2 C53 H53 132.1 . . ? 
C55 C54 C53 119.7(8) . . ? 
C55 C54 Fe2 70.0(5) . . ? 
C53 C54 Fe2 70.1(5) . . ? 
C55 C54 H54 120.2 . . ? 
C53 C54 H54 120.2 . . ? 
Fe2 C54 H54 132.7 . . ? 
C54 C55 C56 122.5(8) . . ? 
C54 C55 Fe2 70.9(5) . . ? 
C56 C55 Fe2 71.8(5) . . ? 
C54 C55 H55 118.8 . . ? 
C56 C55 H55 118.8 . . ? 
Fe2 C55 H55 131.7 . . ? 
C51 C56 C55 116.9(8) . . ? 
C51 C56 C57 120.3(8) . . ? 
C55 C56 C57 122.8(8) . . ? 
C51 C56 Fe2 69.4(5) . . ? 
C55 C56 Fe2 68.6(4) . . ? 
C57 C56 Fe2 134.6(6) . . ? 
C56 C57 H57A 109.5 . . ? 
C56 C57 H57B 109.5 . . ? 
H57A C57 H57B 109.5 . . ? 
C56 C57 H57C 109.5 . . ? 
H57A C57 H57C 109.5 . . ? 
H57B C57 H57C 109.5 . . ? 
C32 N3 C41 119.3(6) . . ? 
C32 N3 Fe2 116.6(5) . . ? 
C41 N3 Fe2 124.1(4) . . ? 
C33 N4 C49 117.4(6) . . ? 
C33 N4 Fe2 117.0(5) . . ? 
C49 N4 Fe2 125.7(5) . . ? 
N3 Fe2 N4 80.9(3) . . ? 
N3 Fe2 C55 157.1(3) . . ? 
N4 Fe2 C55 102.7(3) . . ? 
N3 Fe2 C52 102.0(3) . . ? 
N4 Fe2 C52 155.1(3) . . ? 
C55 Fe2 C52 84.4(3) . . ? 
N3 Fe2 C53 126.8(3) . . ? 
N4 Fe2 C53 119.9(3) . . ? 
C55 Fe2 C53 71.3(3) . . ? 
C52 Fe2 C53 39.4(3) . . ? 
N3 Fe2 C54 163.6(3) . . ? 
N4 Fe2 C54 98.9(3) . . ? 
C55 Fe2 C54 39.1(3) . . ? 
C52 Fe2 C54 71.4(3) . . ? 
C53 Fe2 C54 39.5(3) . . ? 
N3 Fe2 C51 99.8(3) . . ? 
N4 Fe2 C51 165.1(3) . . ? 
C55 Fe2 C51 71.0(3) . . ? 
C52 Fe2 C51 39.5(3) . . ? 
C53 Fe2 C51 71.6(3) . . ? 
C54 Fe2 C51 84.6(3) . . ? 
N3 Fe2 C56 121.2(3) . . ? 
N4 Fe2 C56 128.0(3) . . ? 
C55 Fe2 C56 39.6(3) . . ? 
C52 Fe2 C56 71.9(3) . . ? 
C53 Fe2 C56 85.6(3) . . ? 
C54 Fe2 C56 71.9(3) . . ? 
C51 Fe2 C56 39.4(3) . . ? 
 
loop_ 
 _geom_torsion_atom_site_label_1 
 _geom_torsion_atom_site_label_2 
 _geom_torsion_atom_site_label_3 
 _geom_torsion_atom_site_label_4 
 _geom_torsion 
 _geom_torsion_site_symmetry_1 
 _geom_torsion_site_symmetry_2 
 _geom_torsion_site_symmetry_3 
 _geom_torsion_site_symmetry_4 
 _geom_torsion_publ_flag 
N1 C2 C3 N2 -0.5(9) . . . . ? 
C1 C2 C3 N2 179.4(7) . . . . ? 
N1 C2 C3 C4 -178.4(7) . . . . ? 
C1 C2 C3 C4 1.5(12) . . . . ? 
C11 C6 C7 C8 0.0 . . . . ? 
C5 C6 C7 C8 177.9(5) . . . . ? 
C6 C7 C8 C9 0.0 . . . . ? 
C7 C8 C9 C10 0.0 . . . . ? 
C8 C9 C10 C11 0.0 . . . . ? 
C8 C9 C10 C12 179.9(6) . . . . ? 
C9 C10 C11 C6 0.0 . . . . ? 
C12 C10 C11 C6 -179.9(5) . . . . ? 
C9 C10 C11 N2 -173.3(5) . . . . ? 
C12 C10 C11 N2 6.8(6) . . . . ? 
C7 C6 C11 C10 0.0 . . . . ? 
C5 C6 C11 C10 -177.8(6) . . . . ? 
C7 C6 C11 N2 173.6(5) . . . . ? 
C5 C6 C11 N2 -4.3(6) . . . . ? 
C19 C14 C15 C16 0.0 . . . . ? 
C13 C14 C15 C16 -179.7(6) . . . . ? 
C14 C15 C16 C17 0.0 . . . . ? 
C15 C16 C17 C18 0.0 . . . . ? 
C16 C17 C18 C19 0.0 . . . . ? 
C16 C17 C18 C20 -178.4(6) . . . . ? 
C17 C18 C19 C14 0.0 . . . . ? 
C20 C18 C19 C14 178.4(6) . . . . ? 
C17 C18 C19 N1 174.9(5) . . . . ? 
C20 C18 C19 N1 -6.7(6) . . . . ? 
C15 C14 C19 C18 0.0 . . . . ? 
C13 C14 C19 C18 179.7(6) . . . . ? 
C15 C14 C19 N1 -174.9(5) . . . . ? 
C13 C14 C19 N1 4.9(6) . . . . ? 
C26 C21 C22 C23 0.2(11) . . . . ? 
Fe1 C21 C22 C23 -51.6(6) . . . . ? 
C26 C21 C22 Fe1 51.8(7) . . . . ? 
C21 C22 C23 C24 -0.9(11) . . . . ? 
Fe1 C22 C23 C24 -52.6(7) . . . . ? 
C21 C22 C23 Fe1 51.7(6) . . . . ? 
C22 C23 C24 C25 2.0(12) . . . . ? 
Fe1 C23 C24 C25 -50.5(7) . . . . ? 
C22 C23 C24 Fe1 52.4(6) . . . . ? 
C23 C24 C25 C26 -2.4(12) . . . . ? 
Fe1 C24 C25 C26 -53.1(7) . . . . ? 
C23 C24 C25 Fe1 50.7(7) . . . . ? 
C24 C25 C26 C21 1.6(12) . . . . ? 
Fe1 C25 C26 C21 -50.7(7) . . . . ? 
C24 C25 C26 C27 -177.0(8) . . . . ? 
Fe1 C25 C26 C27 130.7(8) . . . . ? 
C24 C25 C26 Fe1 52.3(7) . . . . ? 
C22 C21 C26 C25 -0.5(12) . . . . ? 
Fe1 C21 C26 C25 50.5(7) . . . . ? 
C22 C21 C26 C27 178.1(7) . . . . ? 
Fe1 C21 C26 C27 -130.9(8) . . . . ? 
C22 C21 C26 Fe1 -51.0(7) . . . . ? 
C3 C2 N1 C19 -179.6(5) . . . . ? 
C1 C2 N1 C19 0.5(9) . . . . ? 
C3 C2 N1 Fe1 0.0(8) . . . . ? 
C1 C2 N1 Fe1 -180.0(5) . . . . ? 
C18 C19 N1 C2 92.3(6) . . . . ? 
C14 C19 N1 C2 -92.8(6) . . . . ? 
C18 C19 N1 Fe1 -87.1(5) . . . . ? 
C14 C19 N1 Fe1 87.8(5) . . . . ? 
C2 C3 N2 C11 178.6(5) . . . . ? 
C4 C3 N2 C11 -3.4(9) . . . . ? 
C2 C3 N2 Fe1 0.8(8) . . . . ? 
C4 C3 N2 Fe1 178.9(5) . . . . ? 
C10 C11 N2 C3 -92.1(6) . . . . ? 
C6 C11 N2 C3 94.5(6) . . . . ? 
C10 C11 N2 Fe1 85.4(5) . . . . ? 
C6 C11 N2 Fe1 -88.0(5) . . . . ? 
C2 N1 Fe1 N2 0.4(5) . . . . ? 
C19 N1 Fe1 N2 179.9(5) . . . . ? 
C2 N1 Fe1 C24 96.2(10) . . . . ? 
C19 N1 Fe1 C24 -84.3(10) . . . . ? 
C2 N1 Fe1 C25 -98.1(9) . . . . ? 
C19 N1 Fe1 C25 81.4(10) . . . . ? 
C2 N1 Fe1 C22 158.3(5) . . . . ? 
C19 N1 Fe1 C22 -22.2(5) . . . . ? 
C2 N1 Fe1 C23 123.1(5) . . . . ? 
C19 N1 Fe1 C23 -57.4(6) . . . . ? 
C2 N1 Fe1 C21 -161.0(5) . . . . ? 
C19 N1 Fe1 C21 18.5(5) . . . . ? 
C2 N1 Fe1 C26 -126.4(5) . . . . ? 
C19 N1 Fe1 C26 53.1(6) . . . . ? 
C3 N2 Fe1 N1 -0.7(5) . . . . ? 
C11 N2 Fe1 N1 -178.2(5) . . . . ? 
C3 N2 Fe1 C24 -161.1(5) . . . . ? 
C11 N2 Fe1 C24 21.4(5) . . . . ? 
C3 N2 Fe1 C25 158.5(5) . . . . ? 
C11 N2 Fe1 C25 -19.1(5) . . . . ? 
C3 N2 Fe1 C22 -96.2(9) . . . . ? 
C11 N2 Fe1 C22 86.3(9) . . . . ? 
C3 N2 Fe1 C23 -125.9(5) . . . . ? 
C11 N2 Fe1 C23 56.5(6) . . . . ? 
C3 N2 Fe1 C21 95.4(10) . . . . ? 
C11 N2 Fe1 C21 -82.1(10) . . . . ? 
C3 N2 Fe1 C26 124.2(5) . . . . ? 
C11 N2 Fe1 C26 -53.3(6) . . . . ? 
C23 C24 Fe1 N1 36.4(12) . . . . ? 
C25 C24 Fe1 N1 172.1(8) . . . . ? 
C23 C24 Fe1 N2 128.9(5) . . . . ? 
C25 C24 Fe1 N2 -95.4(5) . . . . ? 
C23 C24 Fe1 C25 -135.7(7) . . . . ? 
C23 C24 Fe1 C22 -30.3(5) . . . . ? 
C25 C24 Fe1 C22 105.4(5) . . . . ? 
C25 C24 Fe1 C23 135.7(7) . . . . ? 
C23 C24 Fe1 C21 -69.0(5) . . . . ? 
C25 C24 Fe1 C21 66.7(5) . . . . ? 
C23 C24 Fe1 C26 -107.1(6) . . . . ? 
C25 C24 Fe1 C26 28.6(5) . . . . ? 
C26 C25 Fe1 N1 -38.7(11) . . . . ? 
C24 C25 Fe1 N1 -172.6(7) . . . . ? 
C26 C25 Fe1 N2 -133.4(5) . . . . ? 
C24 C25 Fe1 N2 92.7(5) . . . . ? 
C26 C25 Fe1 C24 133.9(7) . . . . ? 
C26 C25 Fe1 C22 67.6(5) . . . . ? 
C24 C25 Fe1 C22 -66.3(5) . . . . ? 
C26 C25 Fe1 C23 106.4(5) . . . . ? 
C24 C25 Fe1 C23 -27.4(5) . . . . ? 
C26 C25 Fe1 C21 29.3(5) . . . . ? 
C24 C25 Fe1 C21 -104.6(5) . . . . ? 
C24 C25 Fe1 C26 -133.9(7) . . . . ? 
C21 C22 Fe1 N1 94.0(5) . . . . ? 
C23 C22 Fe1 N1 -132.5(5) . . . . ? 
C21 C22 Fe1 N2 -174.3(7) . . . . ? 
C23 C22 Fe1 N2 -40.9(10) . . . . ? 
C21 C22 Fe1 C24 -104.1(5) . . . . ? 
C23 C22 Fe1 C24 29.4(5) . . . . ? 
C21 C22 Fe1 C25 -65.9(5) . . . . ? 
C23 C22 Fe1 C25 67.6(5) . . . . ? 
C21 C22 Fe1 C23 -133.5(7) . . . . ? 
C23 C22 Fe1 C21 133.5(7) . . . . ? 
C21 C22 Fe1 C26 -28.0(5) . . . . ? 
C23 C22 Fe1 C26 105.4(5) . . . . ? 
C24 C23 Fe1 N1 -166.1(5) . . . . ? 
C22 C23 Fe1 N1 61.6(6) . . . . ? 
C24 C23 Fe1 N2 -64.4(6) . . . . ? 
C22 C23 Fe1 N2 163.4(4) . . . . ? 
C22 C23 Fe1 C24 -132.2(7) . . . . ? 
C24 C23 Fe1 C25 28.0(5) . . . . ? 
C22 C23 Fe1 C25 -104.2(5) . . . . ? 
C24 C23 Fe1 C22 132.2(7) . . . . ? 
C24 C23 Fe1 C21 103.0(5) . . . . ? 
C22 C23 Fe1 C21 -29.3(5) . . . . ? 
C24 C23 Fe1 C26 65.4(6) . . . . ? 
C22 C23 Fe1 C26 -66.9(5) . . . . ? 
C26 C21 Fe1 N1 131.3(5) . . . . ? 
C22 C21 Fe1 N1 -93.8(5) . . . . ? 
C26 C21 Fe1 N2 38.4(12) . . . . ? 
C22 C21 Fe1 N2 173.3(8) . . . . ? 
C26 C21 Fe1 C24 -67.7(5) . . . . ? 
C22 C21 Fe1 C24 67.2(5) . . . . ? 
C26 C21 Fe1 C25 -29.2(5) . . . . ? 
C22 C21 Fe1 C25 105.7(5) . . . . ? 
C26 C21 Fe1 C22 -134.9(7) . . . . ? 
C26 C21 Fe1 C23 -105.6(6) . . . . ? 
C22 C21 Fe1 C23 29.4(5) . . . . ? 
C22 C21 Fe1 C26 134.9(7) . . . . ? 
C25 C26 Fe1 N1 164.7(4) . . . . ? 
C21 C26 Fe1 N1 -62.3(6) . . . . ? 
C27 C26 Fe1 N1 51.3(11) . . . . ? 
C25 C26 Fe1 N2 60.9(6) . . . . ? 
C21 C26 Fe1 N2 -166.1(5) . . . . ? 
C27 C26 Fe1 N2 -52.5(11) . . . . ? 
C25 C26 Fe1 C24 -29.1(5) . . . . ? 
C21 C26 Fe1 C24 104.0(6) . . . . ? 
C27 C26 Fe1 C24 -142.4(10) . . . . ? 
C21 C26 Fe1 C25 133.0(8) . . . . ? 
C27 C26 Fe1 C25 -113.4(12) . . . . ? 
C25 C26 Fe1 C22 -104.5(5) . . . . ? 
C21 C26 Fe1 C22 28.6(5) . . . . ? 
C27 C26 Fe1 C22 142.1(10) . . . . ? 
C25 C26 Fe1 C23 -66.0(5) . . . . ? 
C21 C26 Fe1 C23 67.0(5) . . . . ? 
C27 C26 Fe1 C23 -179.4(10) . . . . ? 
C25 C26 Fe1 C21 -133.0(8) . . . . ? 
C27 C26 Fe1 C21 113.6(11) . . . . ? 
N3 C32 C33 N4 0.1(8) . . . . ? 
C31 C32 C33 N4 179.3(7) . . . . ? 
N3 C32 C33 C34 177.8(7) . . . . ? 
C31 C32 C33 C34 -3.0(12) . . . . ? 
C41 C36 C37 C38 0.0 . . . . ? 
C35 C36 C37 C38 178.8(6) . . . . ? 
C36 C37 C38 C39 0.0 . . . . ? 
C37 C38 C39 C40 0.0 . . . . ? 
C38 C39 C40 C41 0.0 . . . . ? 
C38 C39 C40 C42 -178.5(5) . . . . ? 
C39 C40 C41 C36 0.0 . . . . ? 
C42 C40 C41 C36 178.5(5) . . . . ? 
C39 C40 C41 N3 175.0(5) . . . . ? 
C42 C40 C41 N3 -6.5(6) . . . . ? 
C37 C36 C41 C40 0.0 . . . . ? 
C35 C36 C41 C40 -178.8(6) . . . . ? 
C37 C36 C41 N3 -175.1(5) . . . . ? 
C35 C36 C41 N3 6.1(6) . . . . ? 
C49 C44 C45 C46 0.0 . . . . ? 
C43 C44 C45 C46 -178.5(6) . . . . ? 
C44 C45 C46 C47 0.0 . . . . ? 
C45 C46 C47 C48 0.0 . . . . ? 
C46 C47 C48 C49 0.0 . . . . ? 
C46 C47 C48 C50 -177.9(5) . . . . ? 
C47 C48 C49 C44 0.0 . . . . ? 
C50 C48 C49 C44 177.8(6) . . . . ? 
C47 C48 C49 N4 -174.3(5) . . . . ? 
C50 C48 C49 N4 3.5(6) . . . . ? 
C45 C44 C49 C48 0.0 . . . . ? 
C43 C44 C49 C48 178.5(6) . . . . ? 
C45 C44 C49 N4 174.2(5) . . . . ? 
C43 C44 C49 N4 -7.3(6) . . . . ? 
C56 C51 C52 C53 0.5(12) . . . . ? 
Fe2 C51 C52 C53 52.0(7) . . . . ? 
C56 C51 C52 Fe2 -51.4(7) . . . . ? 
C51 C52 C53 C54 0.0(12) . . . . ? 
Fe2 C52 C53 C54 52.1(7) . . . . ? 
C51 C52 C53 Fe2 -52.1(7) . . . . ? 
C52 C53 C54 C55 -0.6(12) . . . . ? 
Fe2 C53 C54 C55 51.3(7) . . . . ? 
C52 C53 C54 Fe2 -52.0(7) . . . . ? 
C53 C54 C55 C56 0.8(12) . . . . ? 
Fe2 C54 C55 C56 52.2(7) . . . . ? 
C53 C54 C55 Fe2 -51.4(7) . . . . ? 
C52 C51 C56 C55 -0.4(12) . . . . ? 
Fe2 C51 C56 C55 -51.1(6) . . . . ? 
C52 C51 C56 C57 -178.8(7) . . . . ? 
Fe2 C51 C56 C57 130.5(8) . . . . ? 
C52 C51 C56 Fe2 50.8(7) . . . . ? 
C54 C55 C56 C51 -0.3(12) . . . . ? 
Fe2 C55 C56 C51 51.5(7) . . . . ? 
C54 C55 C56 C57 178.1(8) . . . . ? 
Fe2 C55 C56 C57 -130.1(8) . . . . ? 
C54 C55 C56 Fe2 -51.8(7) . . . . ? 
C33 C32 N3 C41 179.8(5) . . . . ? 
C31 C32 N3 C41 0.6(9) . . . . ? 
C33 C32 N3 Fe2 -0.1(7) . . . . ? 
C31 C32 N3 Fe2 -179.3(5) . . . . ? 
C40 C41 N3 C32 92.7(6) . . . . ? 
C36 C41 N3 C32 -92.2(6) . . . . ? 
C40 C41 N3 Fe2 -87.4(5) . . . . ? 
C36 C41 N3 Fe2 87.6(5) . . . . ? 
C32 C33 N4 C49 -179.8(5) . . . . ? 
C34 C33 N4 C49 2.4(10) . . . . ? 
C32 C33 N4 Fe2 -0.1(8) . . . . ? 
C34 C33 N4 Fe2 -177.9(6) . . . . ? 
C48 C49 N4 C33 -93.2(6) . . . . ? 
C44 C49 N4 C33 92.6(6) . . . . ? 
C48 C49 N4 Fe2 87.2(5) . . . . ? 
C44 C49 N4 Fe2 -87.1(5) . . . . ? 
C32 N3 Fe2 N4 0.0(5) . . . . ? 
C41 N3 Fe2 N4 -179.8(5) . . . . ? 
C32 N3 Fe2 C55 101.1(8) . . . . ? 
C41 N3 Fe2 C55 -78.7(9) . . . . ? 
C32 N3 Fe2 C52 -154.8(5) . . . . ? 
C41 N3 Fe2 C52 25.3(5) . . . . ? 
C32 N3 Fe2 C53 -120.8(5) . . . . ? 
C41 N3 Fe2 C53 59.4(6) . . . . ? 
C32 N3 Fe2 C54 -90.8(12) . . . . ? 
C41 N3 Fe2 C54 89.4(12) . . . . ? 
C32 N3 Fe2 C51 164.9(5) . . . . ? 
C41 N3 Fe2 C51 -14.9(5) . . . . ? 
C32 N3 Fe2 C56 129.3(5) . . . . ? 
C41 N3 Fe2 C56 -50.6(6) . . . . ? 
C33 N4 Fe2 N3 0.0(5) . . . . ? 
C49 N4 Fe2 N3 179.7(5) . . . . ? 
C33 N4 Fe2 C55 -156.9(5) . . . . ? 
C49 N4 Fe2 C55 22.7(5) . . . . ? 
C33 N4 Fe2 C52 98.9(8) . . . . ? 
C49 N4 Fe2 C52 -81.4(9) . . . . ? 
C33 N4 Fe2 C53 127.5(5) . . . . ? 
C49 N4 Fe2 C53 -52.8(6) . . . . ? 
C33 N4 Fe2 C54 163.4(5) . . . . ? 
C49 N4 Fe2 C54 -17.0(6) . . . . ? 
C33 N4 Fe2 C51 -94.1(12) . . . . ? 
C49 N4 Fe2 C51 85.6(12) . . . . ? 
C33 N4 Fe2 C56 -122.7(5) . . . . ? 
C49 N4 Fe2 C56 57.0(6) . . . . ? 
C54 C55 Fe2 N3 174.7(7) . . . . ? 
C56 C55 Fe2 N3 39.3(10) . . . . ? 
C54 C55 Fe2 N4 -88.6(5) . . . . ? 
C56 C55 Fe2 N4 136.0(5) . . . . ? 
C54 C55 Fe2 C52 67.2(5) . . . . ? 
C56 C55 Fe2 C52 -68.2(5) . . . . ? 
C54 C55 Fe2 C53 29.0(5) . . . . ? 
C56 C55 Fe2 C53 -106.4(5) . . . . ? 
C56 C55 Fe2 C54 -135.4(7) . . . . ? 
C54 C55 Fe2 C51 105.4(5) . . . . ? 
C56 C55 Fe2 C51 -30.0(5) . . . . ? 
C54 C55 Fe2 C56 135.4(7) . . . . ? 
C53 C52 Fe2 N3 135.0(5) . . . . ? 
C51 C52 Fe2 N3 -91.0(5) . . . . ? 
C53 C52 Fe2 N4 40.8(9) . . . . ? 
C51 C52 Fe2 N4 174.8(6) . . . . ? 
C53 C52 Fe2 C55 -67.3(5) . . . . ? 
C51 C52 Fe2 C55 66.7(5) . . . . ? 
C51 C52 Fe2 C53 134.0(7) . . . . ? 
C53 C52 Fe2 C54 -29.4(5) . . . . ? 
C51 C52 Fe2 C54 104.6(5) . . . . ? 
C53 C52 Fe2 C51 -134.0(7) . . . . ? 
C53 C52 Fe2 C56 -105.8(5) . . . . ? 
C51 C52 Fe2 C56 28.2(5) . . . . ? 
C52 C53 Fe2 N3 -59.7(6) . . . . ? 
C54 C53 Fe2 N3 167.2(5) . . . . ? 
C52 C53 Fe2 N4 -161.5(5) . . . . ? 
C54 C53 Fe2 N4 65.4(6) . . . . ? 
C52 C53 Fe2 C55 104.3(5) . . . . ? 
C54 C53 Fe2 C55 -28.8(5) . . . . ? 
C54 C53 Fe2 C52 -133.1(7) . . . . ? 
C52 C53 Fe2 C54 133.1(7) . . . . ? 
C52 C53 Fe2 C51 28.8(5) . . . . ? 
C54 C53 Fe2 C51 -104.2(5) . . . . ? 
C52 C53 Fe2 C56 66.5(5) . . . . ? 
C54 C53 Fe2 C56 -66.6(5) . . . . ? 
C55 C54 Fe2 N3 -172.7(9) . . . . ? 
C53 C54 Fe2 N3 -38.9(13) . . . . ? 
C55 C54 Fe2 N4 99.1(5) . . . . ? 
C53 C54 Fe2 N4 -127.1(5) . . . . ? 
C53 C54 Fe2 C55 133.8(7) . . . . ? 
C55 C54 Fe2 C52 -104.5(5) . . . . ? 
C53 C54 Fe2 C52 29.3(5) . . . . ? 
C55 C54 Fe2 C53 -133.8(7) . . . . ? 
C55 C54 Fe2 C51 -66.3(5) . . . . ? 
C53 C54 Fe2 C51 67.5(5) . . . . ? 
C55 C54 Fe2 C56 -28.1(5) . . . . ? 
C53 C54 Fe2 C56 105.7(5) . . . . ? 
C52 C51 Fe2 N3 96.9(5) . . . . ? 
C56 C51 Fe2 N3 -128.1(5) . . . . ? 
C52 C51 Fe2 N4 -171.4(10) . . . . ? 
C56 C51 Fe2 N4 -36.5(14) . . . . ? 
C52 C51 Fe2 C55 -104.8(5) . . . . ? 
C56 C51 Fe2 C55 30.2(5) . . . . ? 
C56 C51 Fe2 C52 134.9(7) . . . . ? 
C52 C51 Fe2 C53 -28.8(5) . . . . ? 
C56 C51 Fe2 C53 106.2(5) . . . . ? 
C52 C51 Fe2 C54 -67.1(5) . . . . ? 
C56 C51 Fe2 C54 67.9(5) . . . . ? 
C52 C51 Fe2 C56 -134.9(7) . . . . ? 
C51 C56 Fe2 N3 64.9(5) . . . . ? 
C55 C56 Fe2 N3 -163.3(4) . . . . ? 
C57 C56 Fe2 N3 -47.8(10) . . . . ? 
C51 C56 Fe2 N4 168.8(4) . . . . ? 
C55 C56 Fe2 N4 -59.4(6) . . . . ? 
C57 C56 Fe2 N4 56.1(10) . . . . ? 
C51 C56 Fe2 C55 -131.8(7) . . . . ? 
C57 C56 Fe2 C55 115.5(11) . . . . ? 
C51 C56 Fe2 C52 -28.3(5) . . . . ? 
C55 C56 Fe2 C52 103.5(5) . . . . ? 
C57 C56 Fe2 C52 -141.0(9) . . . . ? 
C51 C56 Fe2 C53 -66.1(5) . . . . ? 
C55 C56 Fe2 C53 65.7(5) . . . . ? 
C57 C56 Fe2 C53 -178.8(9) . . . . ? 
C51 C56 Fe2 C54 -104.0(5) . . . . ? 
C55 C56 Fe2 C54 27.8(5) . . . . ? 
C57 C56 Fe2 C54 143.3(10) . . . . ? 
C55 C56 Fe2 C51 131.8(7) . . . . ? 
C57 C56 Fe2 C51 -112.7(11) . . . . ? 
 
_diffrn_measured_fraction_theta_max    0.986 
_diffrn_reflns_theta_full              25.74 
_diffrn_measured_fraction_theta_full   0.986 
_refine_diff_density_max    3.035 
_refine_diff_density_min   -0.897 
_refine_diff_density_rms    0.122 

data_Complex_4 
 
_audit_creation_method            SHELXL-97 
_chemical_name_systematic 
; 
 ? 
; 
_chemical_name_common             ? 
_chemical_melting_point           ? 
_chemical_formula_moiety          ? 
_chemical_formula_sum 
 'C20 H24 Fe N2' 
_chemical_formula_weight          348.26 
 
loop_ 
 _atom_type_symbol 
 _atom_type_description 
 _atom_type_scat_dispersion_real 
 _atom_type_scat_dispersion_imag 
 _atom_type_scat_source 
 'C'  'C'   0.0033   0.0016 
 'International Tables Vol C Tables 4.2.6.8 and 6.1.1.4' 
 'H'  'H'   0.0000   0.0000 
 'International Tables Vol C Tables 4.2.6.8 and 6.1.1.4' 
 'Fe'  'Fe'   0.3463   0.8444 
 'International Tables Vol C Tables 4.2.6.8 and 6.1.1.4' 
 'N'  'N'   0.0061   0.0033 
 'International Tables Vol C Tables 4.2.6.8 and 6.1.1.4' 
 
_symmetry_cell_setting            monoclinic 
_symmetry_space_group_name_H-M    P2(1)/c 
 
loop_ 
 _symmetry_equiv_pos_as_xyz 
 'x, y, z' 
 '-x, y+1/2, -z+1/2' 
 '-x, -y, -z' 
 'x, -y-1/2, z-1/2' 
 
_cell_length_a                    9.6363(15) 
_cell_length_b                    21.525(3) 
_cell_length_c                    8.3280(13) 
_cell_angle_alpha                 90.00 
_cell_angle_beta                  106.176(2) 
_cell_angle_gamma                 90.00 
_cell_volume                      1659.0(4) 
_cell_formula_units_Z             4 
_cell_measurement_temperature     100(1) 
_cell_measurement_reflns_used     2293 
_cell_measurement_theta_min       2.365 
_cell_measurement_theta_max       28.9 
 
_exptl_crystal_description        plate 
_exptl_crystal_colour             red 
_exptl_crystal_size_max           0.30 
_exptl_crystal_size_mid           0.15 
_exptl_crystal_size_min           0.04 
_exptl_crystal_density_meas       ? 
_exptl_crystal_density_diffrn     1.394 
_exptl_crystal_density_method     'not measured' 
_exptl_crystal_F_000              736 
_exptl_absorpt_coefficient_mu     0.910 
_exptl_absorpt_correction_type    multi-scan 
_exptl_absorpt_correction_T_min   0.7719 
_exptl_absorpt_correction_T_max   0.9645 
_exptl_absorpt_process_details    'SADABS (Sheldrick, 2009)'  
 
_exptl_special_details 
; 
 ? 
; 
 
_diffrn_ambient_temperature       100(1) 
_diffrn_radiation_wavelength      0.71073 
_diffrn_radiation_type            MoK\a 
_diffrn_radiation_source          'fine-focus sealed tube' 
_diffrn_radiation_monochromator   graphite 
_diffrn_measurement_device_type   'CCD area detector'
_diffrn_measurement_method        'phi and omega scans' 
_diffrn_detector_area_resol_mean  ? 
_diffrn_reflns_number             15582 
_diffrn_reflns_av_R_equivalents   0.0712 
_diffrn_reflns_av_sigmaI/netI     0.0581 
_diffrn_reflns_limit_h_min        -11 
_diffrn_reflns_limit_h_max        11 
_diffrn_reflns_limit_k_min        -26 
_diffrn_reflns_limit_k_max        26 
_diffrn_reflns_limit_l_min        -10 
_diffrn_reflns_limit_l_max        10 
_diffrn_reflns_theta_min          1.89 
_diffrn_reflns_theta_max          25.84 
_reflns_number_total              3208 
_reflns_number_gt                 2376 
_reflns_threshold_expression      >2sigma(I) 
 
_computing_data_collection        'APEX2 v2009.3.0 (Bruker-AXS, 2009)' 
_computing_cell_refinement        'SAINT 7.46A (Bruker-AXS, 2009)' 
_computing_data_reduction         'SAINT 7.46A (Bruker-AXS, 2009)' 
_computing_structure_solution     'SHELXS-97 (Sheldrick, 2008)' 
_computing_structure_refinement   'SHELXL-97 (Sheldrick, 2008)' 
_computing_molecular_graphics     'Bruker SHELXTL' 
_computing_publication_material   'Bruker SHELXTL' 
 
_refine_special_details 
; 
 Refinement of F^2^ against ALL reflections.  The weighted R-factor wR and 
 goodness of fit S are based on F^2^, conventional R-factors R are based 
 on F, with F set to zero for negative F^2^. The threshold expression of 
 F^2^ > 2sigma(F^2^) is used only for calculating R-factors(gt) etc. and is 
 not relevant to the choice of reflections for refinement.  R-factors based 
 on F^2^ are statistically about twice as large as those based on F, and R- 
 factors based on ALL data will be even larger. 
; 
 
_refine_ls_structure_factor_coef  Fsqd  
_refine_ls_matrix_type            full 
_refine_ls_weighting_scheme       calc  
_refine_ls_weighting_details 
 'calc w=1/[\s^2^(Fo^2^)+(0.0407P)^2^+1.0183P] where P=(Fo^2^+2Fc^2^)/3' 
_atom_sites_solution_primary      direct 
_atom_sites_solution_secondary    difmap 
_atom_sites_solution_hydrogens    geom 
_refine_ls_hydrogen_treatment     constr
_refine_ls_extinction_method      none 
_refine_ls_extinction_coef        ? 
_refine_ls_number_reflns          3208 
_refine_ls_number_parameters      214 
_refine_ls_number_restraints      0 
_refine_ls_R_factor_all           0.0670 
_refine_ls_R_factor_gt            0.0395 
_refine_ls_wR_factor_ref          0.0923 
_refine_ls_wR_factor_gt           0.0837 
_refine_ls_goodness_of_fit_ref    1.009 
_refine_ls_restrained_S_all       1.009 
_refine_ls_shift/su_max           0.002 
_refine_ls_shift/su_mean          0.000 
 
loop_ 
 _atom_site_label 
 _atom_site_type_symbol 
 _atom_site_fract_x 
 _atom_site_fract_y 
 _atom_site_fract_z 
 _atom_site_U_iso_or_equiv 
 _atom_site_adp_type 
 _atom_site_occupancy 
 _atom_site_symmetry_multiplicity 
 _atom_site_calc_flag 
 _atom_site_refinement_flags 
 _atom_site_disorder_assembly 
 _atom_site_disorder_group 
Fe1 Fe 0.67370(4) 0.459211(18) 0.65282(5) 0.01310(13) Uani 1 1 d . . . 
N1AA N 0.4957(2) 0.42114(10) 0.5469(3) 0.0136(5) Uani 1 1 d . . . 
N2AA N 0.7196(2) 0.37644(11) 0.7234(3) 0.0146(5) Uani 1 1 d . . . 
C3AA C 0.4868(3) 0.35877(13) 0.5721(3) 0.0158(6) Uani 1 1 d . . . 
C4AA C 0.6287(3) 0.55137(12) 0.5639(3) 0.0136(6) Uani 1 1 d . . . 
C5AA C 0.8581(3) 0.35562(13) 0.8222(3) 0.0136(6) Uani 1 1 d . . . 
C6AA C 0.8727(3) 0.49706(13) 0.7839(4) 0.0181(6) Uani 1 1 d . . . 
H6AA H 0.9568 0.4797 0.8588 0.022 Uiso 1 1 calc R . . 
C7AA C 0.7379(3) 0.52493(13) 0.4983(4) 0.0153(6) Uani 1 1 d . . . 
C8AA C 0.9612(3) 0.33539(13) 0.7425(4) 0.0170(6) Uani 1 1 d . . . 
C9AA C 0.7648(3) 0.52224(13) 0.8475(4) 0.0176(6) Uani 1 1 d . . . 
H9AA H 0.7746 0.5208 0.9641 0.021 Uiso 1 1 calc R . . 
C0BA C 0.7287(3) 0.53080(14) 0.3164(4) 0.0207(7) Uani 1 1 d . . . 
H0BA H 0.7741 0.4945 0.2808 0.031 Uiso 1 1 calc R . . 
H0BB H 0.7790 0.5686 0.2983 0.031 Uiso 1 1 calc R . . 
H0BC H 0.6271 0.5331 0.2512 0.031 Uiso 1 1 calc R . . 
C1BA C 0.6130(3) 0.33356(13) 0.6726(4) 0.0161(6) Uani 1 1 d . . . 
C2BA C 1.0961(3) 0.31722(14) 0.8431(4) 0.0202(7) Uani 1 1 d . . . 
H2BA H 1.1670 0.3032 0.7920 0.024 Uiso 1 1 calc R . . 
C3BA C 1.0259(3) 0.33864(14) 1.0913(4) 0.0213(7) Uani 1 1 d . . . 
H3BA H 1.0490 0.3398 1.2099 0.026 Uiso 1 1 calc R . . 
C4BA C 0.8899(3) 0.35644(13) 0.9965(4) 0.0168(6) Uani 1 1 d . . . 
C5BA C 0.5291(3) 0.58004(14) 0.8067(4) 0.0205(7) Uani 1 1 d . . . 
H5BA H 0.4344 0.5772 0.7239 0.031 Uiso 1 1 calc R . . 
H5BB H 0.5542 0.6238 0.8312 0.031 Uiso 1 1 calc R . . 
H5BC H 0.5256 0.5588 0.9095 0.031 Uiso 1 1 calc R . . 
C7BA C 1.1291(3) 0.31908(14) 1.0141(4) 0.0211(7) Uani 1 1 d . . . 
H7BA H 1.2225 0.3070 1.0799 0.025 Uiso 1 1 calc R . . 
C8BA C 0.9260(3) 0.33230(15) 0.5551(4) 0.0232(7) Uani 1 1 d . . . 
H8BA H 0.9217 0.2888 0.5197 0.035 Uiso 1 1 calc R . . 
H8BB H 1.0010 0.3540 0.5180 0.035 Uiso 1 1 calc R . . 
H8BC H 0.8323 0.3521 0.5055 0.035 Uiso 1 1 calc R . . 
C9BA C 0.8590(3) 0.49700(13) 0.6126(4) 0.0176(6) Uani 1 1 d . . . 
H9BA H 0.9316 0.4780 0.5721 0.021 Uiso 1 1 calc R . . 
C0CA C 0.6416(3) 0.54973(13) 0.7379(3) 0.0149(6) Uani 1 1 d . . . 
C1CA C 0.6348(3) 0.26688(13) 0.7247(4) 0.0219(7) Uani 1 1 d . . . 
H1CA H 0.7263 0.2520 0.7091 0.033 Uiso 1 1 calc R . . 
H1CB H 0.5550 0.2419 0.6563 0.033 Uiso 1 1 calc R . . 
H1CC H 0.6374 0.2631 0.8428 0.033 Uiso 1 1 calc R . . 
C2CA C 0.7770(3) 0.37750(14) 1.0786(4) 0.0222(7) Uani 1 1 d . . . 
H2CA H 0.7448 0.4195 1.0403 0.033 Uiso 1 1 calc R . . 
H2CB H 0.8184 0.3777 1.2002 0.033 Uiso 1 1 calc R . . 
H2CC H 0.6945 0.3490 1.0486 0.033 Uiso 1 1 calc R . . 
C3CA C 0.3512(3) 0.32248(14) 0.4946(4) 0.0217(7) Uani 1 1 d . . . 
H3CA H 0.2736 0.3370 0.5404 0.033 Uiso 1 1 calc R . . 
H3CB H 0.3690 0.2782 0.5199 0.033 Uiso 1 1 calc R . . 
H3CC H 0.3227 0.3286 0.3732 0.033 Uiso 1 1 calc R . . 
 
loop_ 
 _atom_site_aniso_label 
 _atom_site_aniso_U_11 
 _atom_site_aniso_U_22 
 _atom_site_aniso_U_33 
 _atom_site_aniso_U_23 
 _atom_site_aniso_U_13 
 _atom_site_aniso_U_12 
Fe1 0.0105(2) 0.0153(2) 0.0136(2) 0.00145(19) 0.00358(16) -0.00009(18) 
N1AA 0.0096(12) 0.0162(13) 0.0137(12) 0.0015(10) 0.0011(10) 0.0008(10) 
N2AA 0.0129(12) 0.0180(13) 0.0125(12) -0.0012(10) 0.0028(10) 0.0006(10) 
C3AA 0.0154(15) 0.0162(15) 0.0171(16) 0.0013(12) 0.0064(13) -0.0008(12) 
C4AA 0.0099(13) 0.0143(15) 0.0155(15) 0.0010(11) 0.0016(12) -0.0034(11) 
C5AA 0.0123(14) 0.0139(14) 0.0135(15) 0.0012(11) 0.0015(12) 0.0008(11) 
C6AA 0.0120(14) 0.0169(16) 0.0208(17) 0.0037(13) -0.0031(13) -0.0019(12) 
C7AA 0.0150(14) 0.0150(16) 0.0171(15) -0.0002(11) 0.0064(12) -0.0025(11) 
C8AA 0.0200(16) 0.0152(15) 0.0160(15) -0.0008(12) 0.0054(13) -0.0009(12) 
C9AA 0.0200(15) 0.0178(16) 0.0135(15) 0.0012(12) 0.0021(12) -0.0036(12) 
C0BA 0.0204(15) 0.0245(18) 0.0195(16) 0.0016(13) 0.0093(13) -0.0035(13) 
C1BA 0.0154(15) 0.0162(15) 0.0171(16) -0.0001(12) 0.0055(13) -0.0001(12) 
C2BA 0.0154(15) 0.0192(16) 0.0273(18) 0.0010(13) 0.0084(14) 0.0029(13) 
C3BA 0.0255(17) 0.0210(17) 0.0137(16) 0.0006(13) -0.0007(13) 0.0024(13) 
C4BA 0.0213(16) 0.0144(15) 0.0164(16) 0.0019(12) 0.0080(13) 0.0007(12) 
C5BA 0.0223(16) 0.0225(17) 0.0189(16) -0.0033(13) 0.0096(14) -0.0009(13) 
C7BA 0.0139(15) 0.0212(16) 0.0232(18) -0.0004(14) -0.0032(13) 0.0030(13) 
C8BA 0.0224(17) 0.0301(18) 0.0178(17) -0.0008(13) 0.0065(14) 0.0064(14) 
C9BA 0.0122(14) 0.0183(15) 0.0238(17) 0.0001(13) 0.0076(13) -0.0021(12) 
C0CA 0.0127(14) 0.0169(16) 0.0154(15) -0.0025(12) 0.0048(12) -0.0050(12) 
C1CA 0.0207(16) 0.0165(16) 0.0255(17) 0.0024(13) 0.0016(14) -0.0007(13) 
C2CA 0.0283(18) 0.0247(17) 0.0164(16) 0.0038(13) 0.0106(14) 0.0055(14) 
C3CA 0.0184(16) 0.0189(16) 0.0247(18) 0.0022(14) 0.0007(14) -0.0015(13) 
 
_geom_special_details 
; 
 All esds (except the esd in the dihedral angle between two l.s. planes) 
 are estimated using the full covariance matrix.  The cell esds are taken 
 into account individually in the estimation of esds in distances, angles 
 and torsion angles; correlations between esds in cell parameters are only 
 used when they are defined by crystal symmetry.  An approximate (isotropic) 
 treatment of cell esds is used for estimating esds involving l.s. planes. 
; 
 
loop_ 
 _geom_bond_atom_site_label_1 
 _geom_bond_atom_site_label_2 
 _geom_bond_distance 
 _geom_bond_site_symmetry_2 
 _geom_bond_publ_flag 
Fe1 N1AA 1.884(2) . ? 
Fe1 N2AA 1.889(2) . ? 
Fe1 C9BA 2.073(3) . ? 
Fe1 C6AA 2.090(3) . ? 
Fe1 C9AA 2.109(3) . ? 
Fe1 C7AA 2.118(3) . ? 
Fe1 C4AA 2.119(3) . ? 
Fe1 C0CA 2.125(3) . ? 
N1AA C3AA 1.365(3) . ? 
N1AA C4AA 1.422(4) 3_666 ? 
N2AA C1BA 1.358(4) . ? 
N2AA C5AA 1.431(4) . ? 
C3AA C1BA 1.380(4) . ? 
C3AA C3CA 1.505(4) . ? 
C4AA C0CA 1.419(4) . ? 
C4AA N1AA 1.422(4) 3_666 ? 
C4AA C7AA 1.432(4) . ? 
C5AA C4BA 1.397(4) . ? 
C5AA C8AA 1.409(4) . ? 
C6AA C9BA 1.396(4) . ? 
C6AA C9AA 1.400(4) . ? 
C7AA C9BA 1.418(4) . ? 
C7AA C0BA 1.498(4) . ? 
C8AA C2BA 1.392(4) . ? 
C8AA C8BA 1.504(4) . ? 
C9AA C0CA 1.410(4) . ? 
C1BA C1CA 1.497(4) . ? 
C2BA C7BA 1.370(4) . ? 
C3BA C4BA 1.383(4) . ? 
C3BA C7BA 1.392(4) . ? 
C4BA C2CA 1.506(4) . ? 
C5BA C0CA 1.509(4) . ? 
 
loop_ 
 _geom_angle_atom_site_label_1 
 _geom_angle_atom_site_label_2 
 _geom_angle_atom_site_label_3 
 _geom_angle 
 _geom_angle_site_symmetry_1 
 _geom_angle_site_symmetry_3 
 _geom_angle_publ_flag 
N1AA Fe1 N2AA 80.74(10) . . ? 
N1AA Fe1 C9BA 143.91(11) . . ? 
N2AA Fe1 C9BA 106.44(11) . . ? 
N1AA Fe1 C6AA 176.03(11) . . ? 
N2AA Fe1 C6AA 95.97(11) . . ? 
C9BA Fe1 C6AA 39.19(11) . . ? 
N1AA Fe1 C9AA 140.33(10) . . ? 
N2AA Fe1 C9AA 110.87(11) . . ? 
C9BA Fe1 C9AA 71.26(11) . . ? 
C6AA Fe1 C9AA 38.96(11) . . ? 
N1AA Fe1 C7AA 112.85(10) . . ? 
N2AA Fe1 C7AA 137.42(10) . . ? 
C9BA Fe1 C7AA 39.53(11) . . ? 
C6AA Fe1 C7AA 71.09(11) . . ? 
C9AA Fe1 C7AA 84.70(11) . . ? 
N1AA Fe1 C4AA 99.93(10) . . ? 
N2AA Fe1 C4AA 176.87(10) . . ? 
C9BA Fe1 C4AA 71.21(11) . . ? 
C6AA Fe1 C4AA 83.47(11) . . ? 
C9AA Fe1 C4AA 70.56(11) . . ? 
C7AA Fe1 C4AA 39.52(10) . . ? 
N1AA Fe1 C0CA 110.91(10) . . ? 
N2AA Fe1 C0CA 143.52(10) . . ? 
C9BA Fe1 C0CA 84.60(11) . . ? 
C6AA Fe1 C0CA 70.48(11) . . ? 
C9AA Fe1 C0CA 38.92(11) . . ? 
C7AA Fe1 C0CA 71.60(10) . . ? 
C4AA Fe1 C0CA 39.07(10) . . ? 
C3AA N1AA C4AA 115.6(2) . 3_666 ? 
C3AA N1AA Fe1 116.34(19) . . ? 
C4AA N1AA Fe1 128.01(18) 3_666 . ? 
C1BA N2AA C5AA 118.0(2) . . ? 
C1BA N2AA Fe1 116.94(19) . . ? 
C5AA N2AA Fe1 125.03(18) . . ? 
N1AA C3AA C1BA 113.4(3) . . ? 
N1AA C3AA C3CA 121.9(3) . . ? 
C1BA C3AA C3CA 124.7(3) . . ? 
C0CA C4AA N1AA 119.4(2) . 3_666 ? 
C0CA C4AA C7AA 121.0(3) . . ? 
N1AA C4AA C7AA 119.6(2) 3_666 . ? 
C0CA C4AA Fe1 70.67(16) . . ? 
N1AA C4AA Fe1 132.04(19) 3_666 . ? 
C7AA C4AA Fe1 70.17(15) . . ? 
C4BA C5AA C8AA 120.9(3) . . ? 
C4BA C5AA N2AA 119.5(2) . . ? 
C8AA C5AA N2AA 119.6(2) . . ? 
C9BA C6AA C9AA 121.2(3) . . ? 
C9BA C6AA Fe1 69.74(16) . . ? 
C9AA C6AA Fe1 71.24(17) . . ? 
C9BA C7AA C4AA 117.9(2) . . ? 
C9BA C7AA C0BA 121.4(2) . . ? 
C4AA C7AA C0BA 120.6(3) . . ? 
C9BA C7AA Fe1 68.52(15) . . ? 
C4AA C7AA Fe1 70.31(15) . . ? 
C0BA C7AA Fe1 136.5(2) . . ? 
C2BA C8AA C5AA 117.8(3) . . ? 
C2BA C8AA C8BA 121.0(3) . . ? 
C5AA C8AA C8BA 121.2(3) . . ? 
C6AA C9AA C0CA 119.8(3) . . ? 
C6AA C9AA Fe1 69.79(17) . . ? 
C0CA C9AA Fe1 71.16(17) . . ? 
N2AA C1BA C3AA 112.5(3) . . ? 
N2AA C1BA C1CA 121.9(3) . . ? 
C3AA C1BA C1CA 125.5(3) . . ? 
C7BA C2BA C8AA 121.7(3) . . ? 
C4BA C3BA C7BA 120.3(3) . . ? 
C3BA C4BA C5AA 119.3(3) . . ? 
C3BA C4BA C2CA 120.9(3) . . ? 
C5AA C4BA C2CA 119.9(3) . . ? 
C2BA C7BA C3BA 120.0(3) . . ? 
C6AA C9BA C7AA 120.8(3) . . ? 
C6AA C9BA Fe1 71.07(16) . . ? 
C7AA C9BA Fe1 71.95(15) . . ? 
C9AA C0CA C4AA 119.3(2) . . ? 
C9AA C0CA C5BA 120.0(2) . . ? 
C4AA C0CA C5BA 120.6(3) . . ? 
C9AA C0CA Fe1 69.92(16) . . ? 
C4AA C0CA Fe1 70.26(15) . . ? 
C5BA C0CA Fe1 135.22(19) . . ? 
 
_diffrn_measured_fraction_theta_max    0.998 
_diffrn_reflns_theta_full              25.84 
_diffrn_measured_fraction_theta_full   0.998 
_refine_diff_density_max    0.391 
_refine_diff_density_min   -0.364 
_refine_diff_density_rms    0.071 

data_complex_5 
 
_audit_creation_method            SHELXL-97 
_chemical_name_systematic 
; 
 ? 
; 
_chemical_name_common             ? 
_chemical_melting_point           ? 
_chemical_formula_moiety          ? 
_chemical_formula_sum 
 'C40 H48 Fe N4' 
_chemical_formula_weight          640.67 
 
loop_ 
 _atom_type_symbol 
 _atom_type_description 
 _atom_type_scat_dispersion_real 
 _atom_type_scat_dispersion_imag 
 _atom_type_scat_source 
 'C'  'C'   0.0033   0.0016 
 'International Tables Vol C Tables 4.2.6.8 and 6.1.1.4' 
 'Fe'  'Fe'   0.3463   0.8444 
 'International Tables Vol C Tables 4.2.6.8 and 6.1.1.4' 
 'N'  'N'   0.0061   0.0033 
 'International Tables Vol C Tables 4.2.6.8 and 6.1.1.4' 
 'H'  'H'   0.0000   0.0000 
 'International Tables Vol C Tables 4.2.6.8 and 6.1.1.4' 
 
_symmetry_cell_setting            orthorhombic 
_symmetry_space_group_name_H-M    Fddd
 
loop_ 
 _symmetry_equiv_pos_as_xyz 
 'x, y, z' 
 '-x+1/4, -y+1/4, z' 
 'x, -y+1/4, -z+1/4' 
 '-x+1/4, y, -z+1/4' 
 'x, y+1/2, z+1/2' 
 '-x+1/4, -y+3/4, z+1/2' 
 'x, -y+3/4, -z+3/4' 
 '-x+1/4, y+1/2, -z+3/4' 
 'x+1/2, y, z+1/2' 
 '-x+3/4, -y+1/4, z+1/2' 
 'x+1/2, -y+1/4, -z+3/4' 
 '-x+3/4, y, -z+3/4' 
 'x+1/2, y+1/2, z' 
 '-x+3/4, -y+3/4, z' 
 'x+1/2, -y+3/4, -z+1/4' 
 '-x+3/4, y+1/2, -z+1/4' 
 '-x, -y, -z' 
 'x-1/4, y-1/4, -z' 
 '-x, y-1/4, z-1/4' 
 'x-1/4, -y, z-1/4' 
 '-x, -y+1/2, -z+1/2' 
 'x-1/4, y+1/4, -z+1/2' 
 '-x, y+1/4, z+1/4' 
 'x-1/4, -y+1/2, z+1/4' 
 '-x+1/2, -y, -z+1/2' 
 'x+1/4, y-1/4, -z+1/2' 
 '-x+1/2, y-1/4, z+1/4' 
 'x+1/4, -y, z+1/4' 
 '-x+1/2, -y+1/2, -z' 
 'x+1/4, y+1/4, -z' 
 '-x+1/2, y+1/4, z-1/4' 
 'x+1/4, -y+1/2, z-1/4' 
 
_cell_length_a                    11.364(6) 
_cell_length_b                    24.534(13) 
_cell_length_c                    24.644(13) 
_cell_angle_alpha                 90.00 
_cell_angle_beta                  90.00 
_cell_angle_gamma                 90.00 
_cell_volume                      6871(6) 
_cell_formula_units_Z             8 
_cell_measurement_temperature     100(1) 
_cell_measurement_reflns_used     2277 
_cell_measurement_theta_min       2.343 
_cell_measurement_theta_max       20.03 
 
_exptl_crystal_description        block 
_exptl_crystal_colour             red 
_exptl_crystal_size_max           .4 
_exptl_crystal_size_mid           .15 
_exptl_crystal_size_min           .15 
_exptl_crystal_density_meas       ? 
_exptl_crystal_density_diffrn     1.239 
_exptl_crystal_density_method     'not measured' 
_exptl_crystal_F_000              2353 
_exptl_absorpt_coefficient_mu     0.469 
_exptl_absorpt_correction_type    multi-scan 
_exptl_absorpt_correction_T_min   0.8346 
_exptl_absorpt_correction_T_max   0.9330 
_exptl_absorpt_process_details    'SADABS (Sheldrick, 2008)' 
 
_exptl_special_details 
; 
 ? 
; 
 
_diffrn_ambient_temperature       100(1) 
_diffrn_radiation_wavelength      0.71073 
_diffrn_radiation_type            MoK\a 
_diffrn_radiation_source          'fine-focus sealed tube' 
_diffrn_radiation_monochromator   graphite 
_diffrn_measurement_device_type  
;
Bruker D8 goniometer with CCD area detector
; 
_diffrn_measurement_method        'phi and omega scans' 
_diffrn_detector_area_resol_mean  ? 
_diffrn_reflns_number             17818 
_diffrn_reflns_av_R_equivalents   0.0909 
_diffrn_reflns_av_sigmaI/netI     0.0418 
_diffrn_reflns_limit_h_min        -13 
_diffrn_reflns_limit_h_max        13 
_diffrn_reflns_limit_k_min        -29 
_diffrn_reflns_limit_k_max        29 
_diffrn_reflns_limit_l_min        -30 
_diffrn_reflns_limit_l_max        29 
_diffrn_reflns_theta_min          1.65 
_diffrn_reflns_theta_max          25.74 
_reflns_number_total              1652 
_reflns_number_gt                 1462 
_reflns_threshold_expression      >2sigma(I) 
 
_computing_data_collection        'APEX2 v2009.3.0 (Bruker-AXS, 2009)' 
_computing_cell_refinement        'SAINT 7.46A (Bruker-AXS, 2009)' 
_computing_data_reduction         'SAINT 7.46A (Bruker-AXS, 2009)' 
_computing_structure_solution     'SHELXS-97 (Sheldrick, 2008)' 
_computing_structure_refinement   'SHELXL-97 (Sheldrick, 2008)' 
_computing_molecular_graphics     'Bruker SHELXTL (Sheldrick, 2008)' 
_computing_publication_material   'Bruker SHELXTL (Sheldrick, 2008)'  
 
_refine_special_details 
; 
 Refinement of F^2^ against ALL reflections.  The weighted R-factor wR and 
 goodness of fit S are based on F^2^, conventional R-factors R are based 
 on F, with F set to zero for negative F^2^. The threshold expression of 
 F^2^ > 2sigma(F^2^) is used only for calculating R-factors(gt) etc. and is 
 not relevant to the choice of reflections for refinement.  R-factors based 
 on F^2^ are statistically about twice as large as those based on F, and R- 
 factors based on ALL data will be even larger. 
; 
 
_refine_ls_structure_factor_coef  Fsqd  
_refine_ls_matrix_type            full 
_refine_ls_weighting_scheme       calc  
_refine_ls_weighting_details 
 'calc w=1/[\s^2^(Fo^2^)+(0.0591P)^2^+6.6874P] where P=(Fo^2^+2Fc^2^)/3' 
_atom_sites_solution_primary      direct 
_atom_sites_solution_secondary    difmap 
_atom_sites_solution_hydrogens    geom 
_refine_ls_hydrogen_treatment     constr
_refine_ls_extinction_method      none 
_refine_ls_extinction_coef        ? 
_refine_ls_number_reflns          1652 
_refine_ls_number_parameters      107 
_refine_ls_number_restraints      0 
_refine_ls_R_factor_all           0.0506 
_refine_ls_R_factor_gt            0.0411 
_refine_ls_wR_factor_ref          0.1023 
_refine_ls_wR_factor_gt           0.0967 
_refine_ls_goodness_of_fit_ref    1.051 
_refine_ls_restrained_S_all       1.051 
_refine_ls_shift/su_max           0.002 
_refine_ls_shift/su_mean          0.000 
 
loop_ 
 _atom_site_label 
 _atom_site_type_symbol 
 _atom_site_fract_x 
 _atom_site_fract_y 
 _atom_site_fract_z 
 _atom_site_U_iso_or_equiv 
 _atom_site_adp_type 
 _atom_site_occupancy 
 _atom_site_symmetry_multiplicity 
 _atom_site_calc_flag 
 _atom_site_refinement_flags 
 _atom_site_disorder_assembly 
 _atom_site_disorder_group 
Fe49 Fe 0.6250 0.6250 0.6250 0.0178(2) Uani 1 4 d S . . 
N1 N 0.70235(18) 0.56276(9) 0.58693(8) 0.0195(5) Uani 1 1 d . . . 
C1 C 0.6263(2) 0.55704(14) 0.47565(12) 0.0297(7) Uani 1 1 d . . . 
H1A H 0.6127 0.5707 0.4388 0.044 Uiso 1 1 calc R . . 
H1B H 0.5766 0.5771 0.5013 0.044 Uiso 1 1 calc R . . 
H1C H 0.6066 0.5182 0.4772 0.044 Uiso 1 1 calc R . . 
C2 C 0.9088(2) 0.56576(12) 0.55940(12) 0.0238(6) Uani 1 1 d . . . 
C5 C 0.7112(2) 0.46060(12) 0.57976(12) 0.0267(6) Uani 1 1 d . . . 
H5A H 0.6513 0.4455 0.5554 0.040 Uiso 1 1 calc R . . 
H5B H 0.7276 0.4344 0.6088 0.040 Uiso 1 1 calc R . . 
H5C H 0.7835 0.4677 0.5593 0.040 Uiso 1 1 calc R . . 
C6 C 0.9932(3) 0.57116(12) 0.51812(12) 0.0281(7) Uani 1 1 d . . . 
H6 H 1.0744 0.5729 0.5271 0.034 Uiso 1 1 calc R . . 
C7 C 0.9584(3) 0.57397(12) 0.46425(12) 0.0304(7) Uani 1 1 d . . . 
H7 H 1.0157 0.5785 0.4365 0.036 Uiso 1 1 calc R . . 
C8 C 0.8402(3) 0.57023(12) 0.45084(12) 0.0279(7) Uani 1 1 d . . . 
H8 H 0.8177 0.5714 0.4137 0.033 Uiso 1 1 calc R . . 
C10 C 0.7894(2) 0.56466(11) 0.54514(10) 0.0218(6) Uani 1 1 d . . . 
C12 C 0.6670(2) 0.51293(11) 0.60391(11) 0.0214(6) Uani 1 1 d . . . 
C13 C 0.7536(2) 0.56481(12) 0.49055(11) 0.0242(6) Uani 1 1 d . . . 
C19 C 0.9458(2) 0.55733(13) 0.61734(12) 0.0324(7) Uani 1 1 d . . . 
H19A H 0.9402 0.5185 0.6265 0.049 Uiso 1 1 calc R . . 
H19B H 0.8941 0.5783 0.6413 0.049 Uiso 1 1 calc R . . 
H19C H 1.0272 0.5697 0.6220 0.049 Uiso 1 1 calc R . . 
 
loop_ 
 _atom_site_aniso_label 
 _atom_site_aniso_U_11 
 _atom_site_aniso_U_22 
 _atom_site_aniso_U_33 
 _atom_site_aniso_U_23 
 _atom_site_aniso_U_13 
 _atom_site_aniso_U_12 
Fe49 0.0128(3) 0.0235(5) 0.0173(5) 0.000 0.000 0.000 
N1 0.0163(10) 0.0218(13) 0.0204(11) 0.0016(9) 0.0015(8) -0.0005(9) 
C1 0.0264(14) 0.0381(19) 0.0245(15) -0.0039(13) -0.0017(12) -0.0006(13) 
C2 0.0189(11) 0.0252(17) 0.0273(16) -0.0002(11) 0.0034(11) 0.0022(12) 
C5 0.0257(14) 0.0248(16) 0.0297(16) -0.0016(13) 0.0064(12) 0.0008(13) 
C6 0.0201(14) 0.0237(17) 0.0406(17) 0.0019(13) 0.0075(12) 0.0032(12) 
C7 0.0280(14) 0.0289(17) 0.0341(17) 0.0032(13) 0.0142(13) 0.0022(12) 
C8 0.0329(15) 0.0262(17) 0.0244(15) 0.0030(13) 0.0070(12) 0.0031(12) 
C10 0.0205(12) 0.0210(14) 0.0238(14) -0.0003(12) 0.0068(10) 0.0002(10) 
C12 0.0159(12) 0.0254(16) 0.0230(14) 0.0003(12) -0.0001(10) 0.0005(11) 
C13 0.0240(14) 0.0254(17) 0.0233(15) -0.0007(12) 0.0036(11) 0.0029(12) 
C19 0.0197(13) 0.0387(19) 0.0386(18) 0.0019(15) -0.0015(12) 0.0033(13) 
 
_geom_special_details 
; 
 All esds (except the esd in the dihedral angle between two l.s. planes) 
 are estimated using the full covariance matrix.  The cell esds are taken 
 into account individually in the estimation of esds in distances, angles 
 and torsion angles; correlations between esds in cell parameters are only 
 used when they are defined by crystal symmetry.  An approximate (isotropic) 
 treatment of cell esds is used for estimating esds involving l.s. planes. 
; 
 
loop_ 
 _geom_bond_atom_site_label_1 
 _geom_bond_atom_site_label_2 
 _geom_bond_distance 
 _geom_bond_site_symmetry_2 
 _geom_bond_publ_flag 
Fe49 N1 1.996(2) . ? 
Fe49 N1 1.996(2) 3_566 ? 
Fe49 N1 1.996(2) 4_656 ? 
Fe49 N1 1.996(2) 2_665 ? 
N1 C12 1.353(3) . ? 
N1 C10 1.429(3) . ? 
C1 C13 1.505(4) . ? 
C1 H1A 0.9800 . ? 
C1 H1B 0.9800 . ? 
C1 H1C 0.9800 . ? 
C2 C10 1.402(4) . ? 
C2 C6 1.405(4) . ? 
C2 C19 1.503(4) . ? 
C5 C12 1.501(4) . ? 
C5 H5A 0.9800 . ? 
C5 H5B 0.9800 . ? 
C5 H5C 0.9800 . ? 
C6 C7 1.387(4) . ? 
C6 H6 0.9500 . ? 
C7 C8 1.386(4) . ? 
C7 H7 0.9500 . ? 
C8 C13 1.394(4) . ? 
C8 H8 0.9500 . ? 
C10 C13 1.405(4) . ? 
C12 C12 1.412(5) 4_656 ? 
C19 H19A 0.9800 . ? 
C19 H19B 0.9800 . ? 
C19 H19C 0.9800 . ? 
 
loop_ 
 _geom_angle_atom_site_label_1 
 _geom_angle_atom_site_label_2 
 _geom_angle_atom_site_label_3 
 _geom_angle 
 _geom_angle_site_symmetry_1 
 _geom_angle_site_symmetry_3 
 _geom_angle_publ_flag 
N1 Fe49 N1 127.75(12) . 3_566 ? 
N1 Fe49 N1 80.19(12) . 4_656 ? 
N1 Fe49 N1 123.93(12) 3_566 4_656 ? 
N1 Fe49 N1 123.93(12) . 2_665 ? 
N1 Fe49 N1 80.19(12) 3_566 2_665 ? 
N1 Fe49 N1 127.75(12) 4_656 2_665 ? 
C12 N1 C10 117.2(2) . . ? 
C12 N1 Fe49 114.53(17) . . ? 
C10 N1 Fe49 128.23(17) . . ? 
C13 C1 H1A 109.5 . . ? 
C13 C1 H1B 109.5 . . ? 
H1A C1 H1B 109.5 . . ? 
C13 C1 H1C 109.5 . . ? 
H1A C1 H1C 109.5 . . ? 
H1B C1 H1C 109.5 . . ? 
C10 C2 C6 118.8(3) . . ? 
C10 C2 C19 120.4(2) . . ? 
C6 C2 C19 120.7(2) . . ? 
C12 C5 H5A 109.5 . . ? 
C12 C5 H5B 109.5 . . ? 
H5A C5 H5B 109.5 . . ? 
C12 C5 H5C 109.5 . . ? 
H5A C5 H5C 109.5 . . ? 
H5B C5 H5C 109.5 . . ? 
C7 C6 C2 120.3(3) . . ? 
C7 C6 H6 119.9 . . ? 
C2 C6 H6 119.9 . . ? 
C8 C7 C6 120.0(3) . . ? 
C8 C7 H7 120.0 . . ? 
C6 C7 H7 120.0 . . ? 
C7 C8 C13 121.5(3) . . ? 
C7 C8 H8 119.2 . . ? 
C13 C8 H8 119.2 . . ? 
C2 C10 C13 121.3(2) . . ? 
C2 C10 N1 119.3(2) . . ? 
C13 C10 N1 119.4(2) . . ? 
N1 C12 C12 115.36(15) . 4_656 ? 
N1 C12 C5 123.4(2) . . ? 
C12 C12 C5 121.21(15) 4_656 . ? 
C8 C13 C10 117.9(3) . . ? 
C8 C13 C1 121.3(3) . . ? 
C10 C13 C1 120.7(2) . . ? 
C2 C19 H19A 109.5 . . ? 
C2 C19 H19B 109.5 . . ? 
H19A C19 H19B 109.5 . . ? 
C2 C19 H19C 109.5 . . ? 
H19A C19 H19C 109.5 . . ? 
H19B C19 H19C 109.5 . . ? 
 
loop_ 
 _geom_torsion_atom_site_label_1 
 _geom_torsion_atom_site_label_2 
 _geom_torsion_atom_site_label_3 
 _geom_torsion_atom_site_label_4 
 _geom_torsion 
 _geom_torsion_site_symmetry_1 
 _geom_torsion_site_symmetry_2 
 _geom_torsion_site_symmetry_3 
 _geom_torsion_site_symmetry_4 
 _geom_torsion_publ_flag 
N1 Fe49 N1 C12 125.96(19) 3_566 . . . ? 
N1 Fe49 N1 C12 0.32(13) 4_656 . . . ? 
N1 Fe49 N1 C12 -128.91(19) 2_665 . . . ? 
N1 Fe49 N1 C10 -53.48(19) 3_566 . . . ? 
N1 Fe49 N1 C10 -179.1(3) 4_656 . . . ? 
N1 Fe49 N1 C10 51.66(19) 2_665 . . . ? 
C10 C2 C6 C7 -1.6(4) . . . . ? 
C19 C2 C6 C7 174.2(3) . . . . ? 
C2 C6 C7 C8 -1.5(4) . . . . ? 
C6 C7 C8 C13 1.4(5) . . . . ? 
C6 C2 C10 C13 4.7(4) . . . . ? 
C19 C2 C10 C13 -171.0(3) . . . . ? 
C6 C2 C10 N1 -176.0(3) . . . . ? 
C19 C2 C10 N1 8.3(4) . . . . ? 
C12 N1 C10 C2 -90.2(3) . . . . ? 
Fe49 N1 C10 C2 89.2(3) . . . . ? 
C12 N1 C10 C13 89.1(3) . . . . ? 
Fe49 N1 C10 C13 -91.4(3) . . . . ? 
C10 N1 C12 C12 178.6(3) . . . 4_656 ? 
Fe49 N1 C12 C12 -0.9(4) . . . 4_656 ? 
C10 N1 C12 C5 -2.3(4) . . . . ? 
Fe49 N1 C12 C5 178.2(2) . . . . ? 
C7 C8 C13 C10 1.6(4) . . . . ? 
C7 C8 C13 C1 -175.9(3) . . . . ? 
C2 C10 C13 C8 -4.7(4) . . . . ? 
N1 C10 C13 C8 175.9(2) . . . . ? 
C2 C10 C13 C1 172.8(3) . . . . ? 
N1 C10 C13 C1 -6.5(4) . . . . ? 
 
_diffrn_measured_fraction_theta_max    0.999 
_diffrn_reflns_theta_full              25.74 
_diffrn_measured_fraction_theta_full   0.999 
_refine_diff_density_max    0.243 
_refine_diff_density_min   -0.677 
_refine_diff_density_rms    0.064 
